# Supplementary material for: 2-Acetyl-5,8-dihydro-6-(4-methyl-3-pentenyl)-1,4-naphthohydroquinone-Derived Chalcones as Potential Anticancer Agents
Source: MDPI journal article supplement (doi:10.3390/molecules28207172), 2023-10-19
Supplement: s1 [file s1]

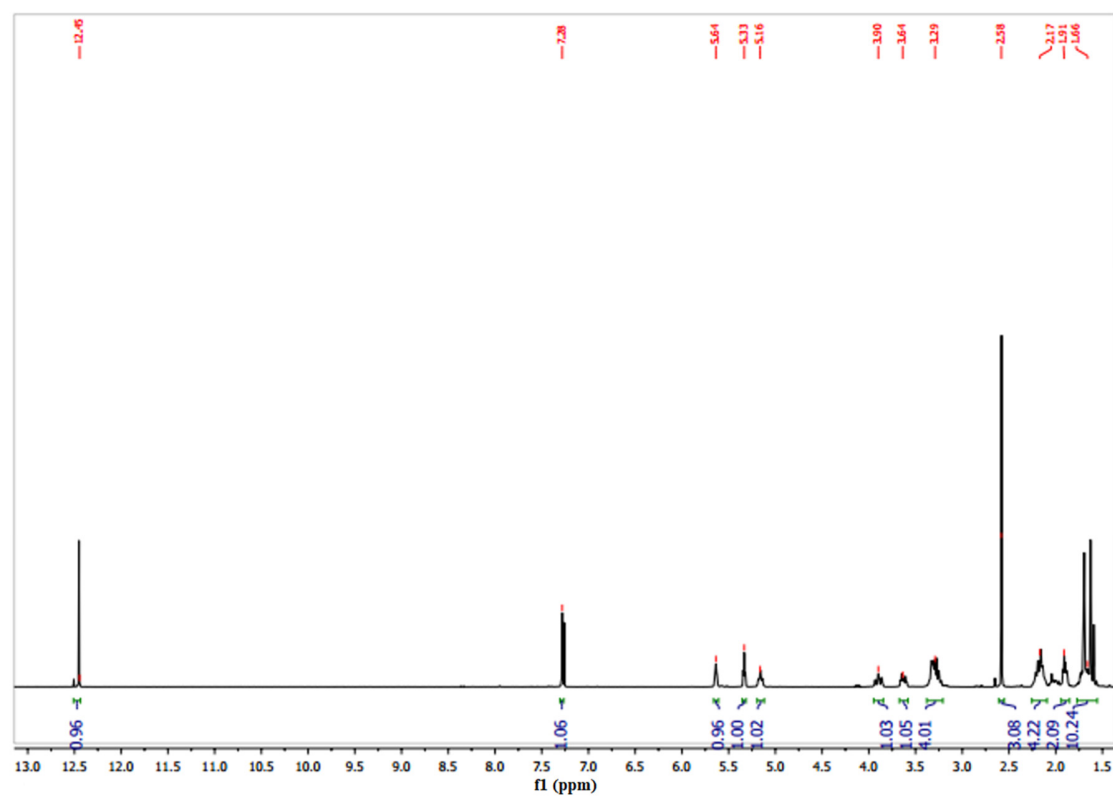

Figure S1.  $^1\text{H}$  NMR spectrum of compound 2.

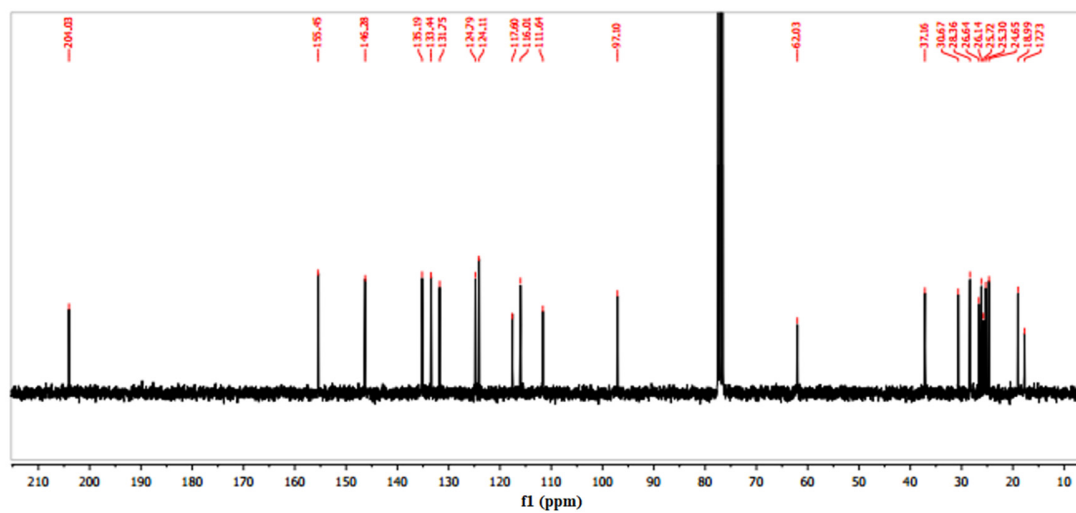

**Figure S2.**  $^{13}\text{C}$  NMR spectrum of compound 2.

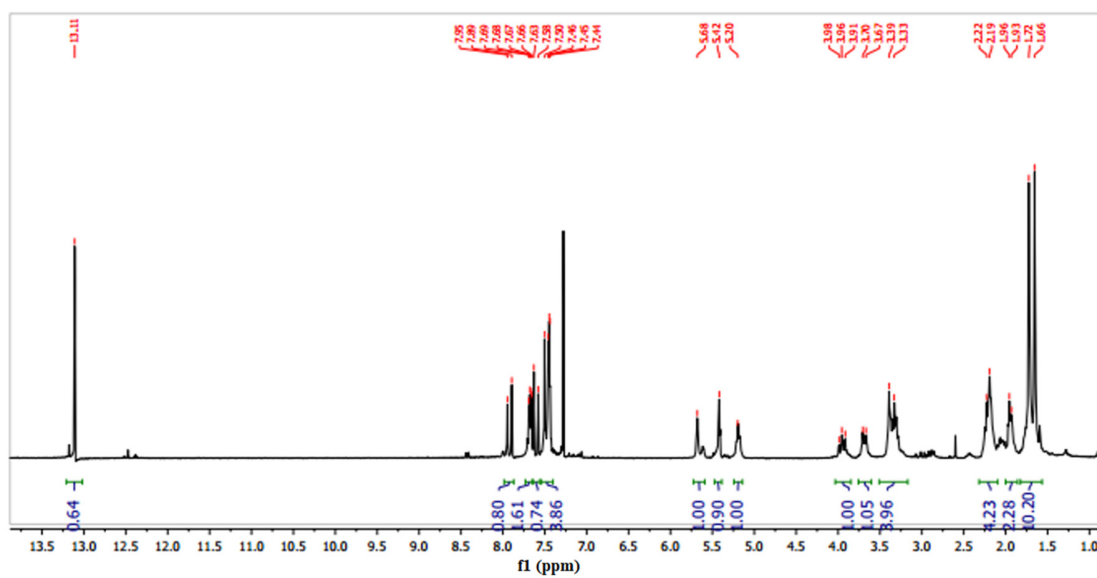

Figure S3.  $^1\text{H}$  NMR spectrum of compound **3a**.

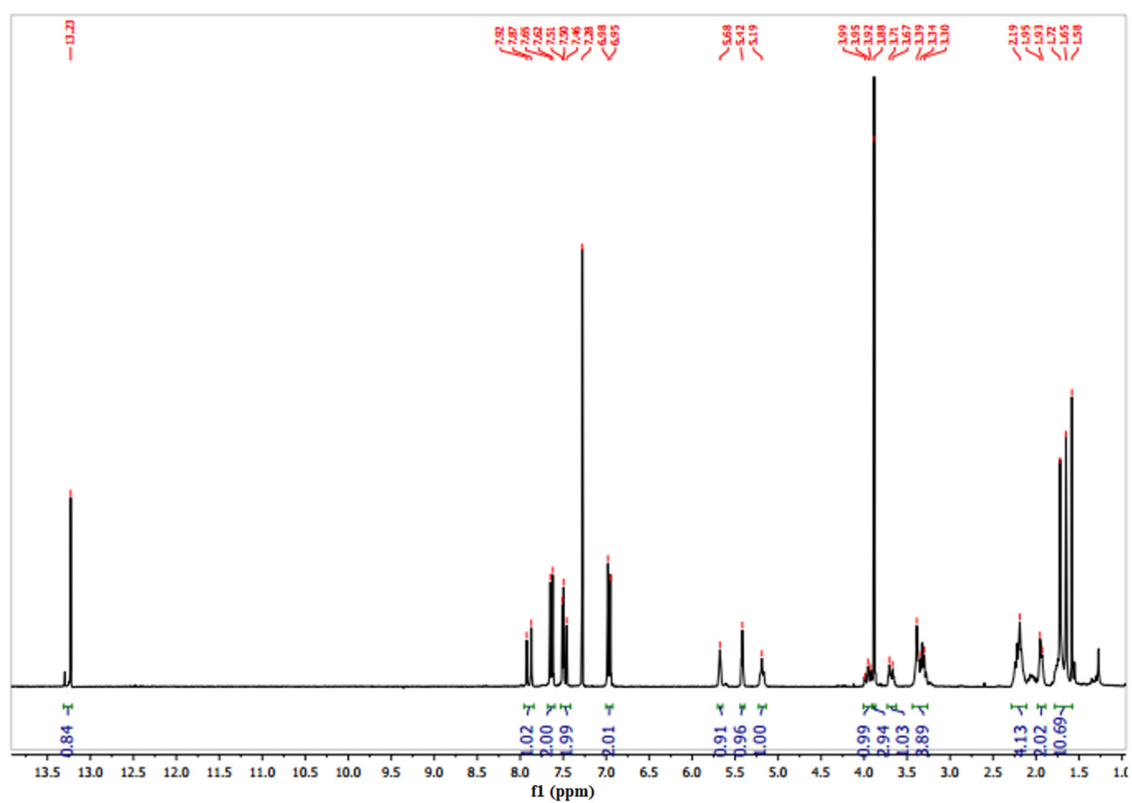

**Figure S4.** <sup>1</sup>H NMR spectrum of compound **3b**.



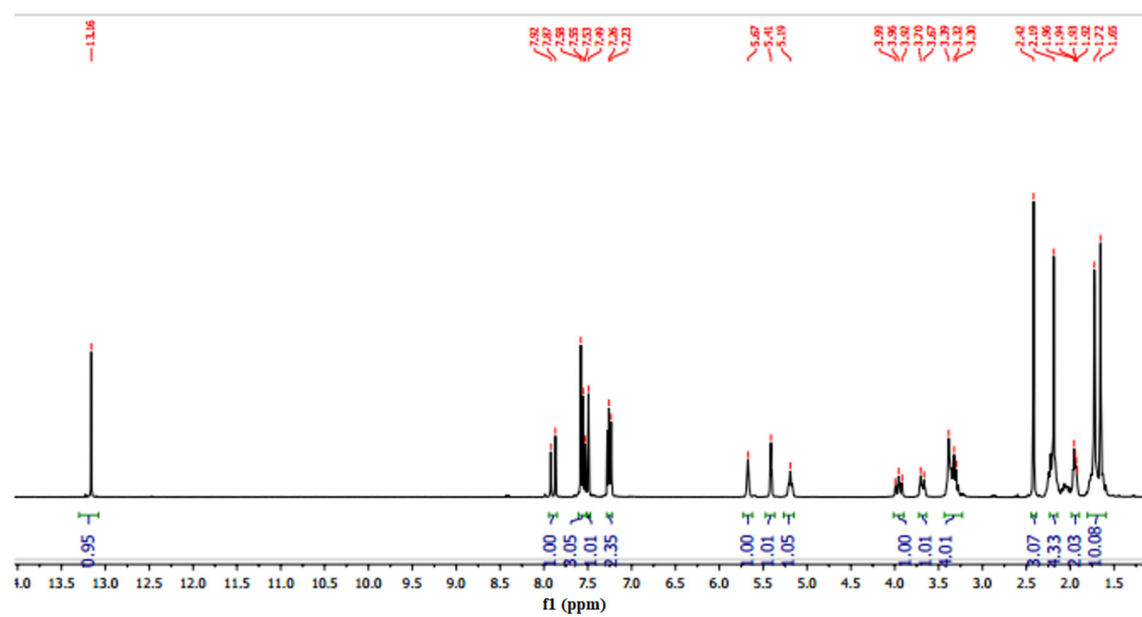

**Figure S5.**  $^1\text{H}$  NMR spectrum of compound **3c**.

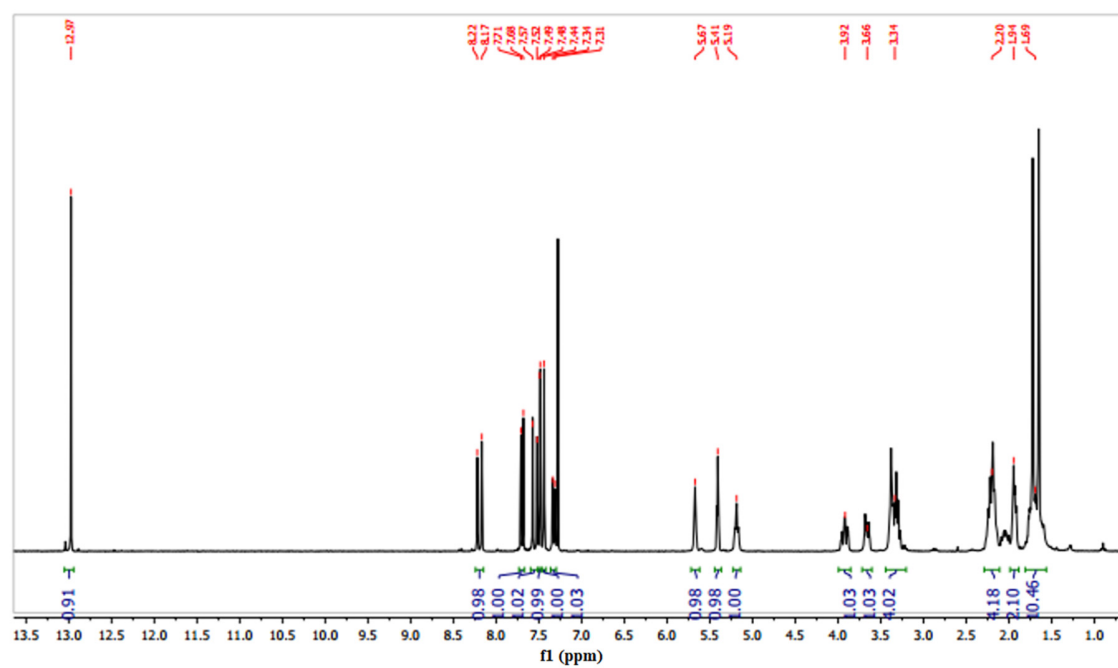

Figure S6. <sup>1</sup>H NMR spectrum of compound 3d.

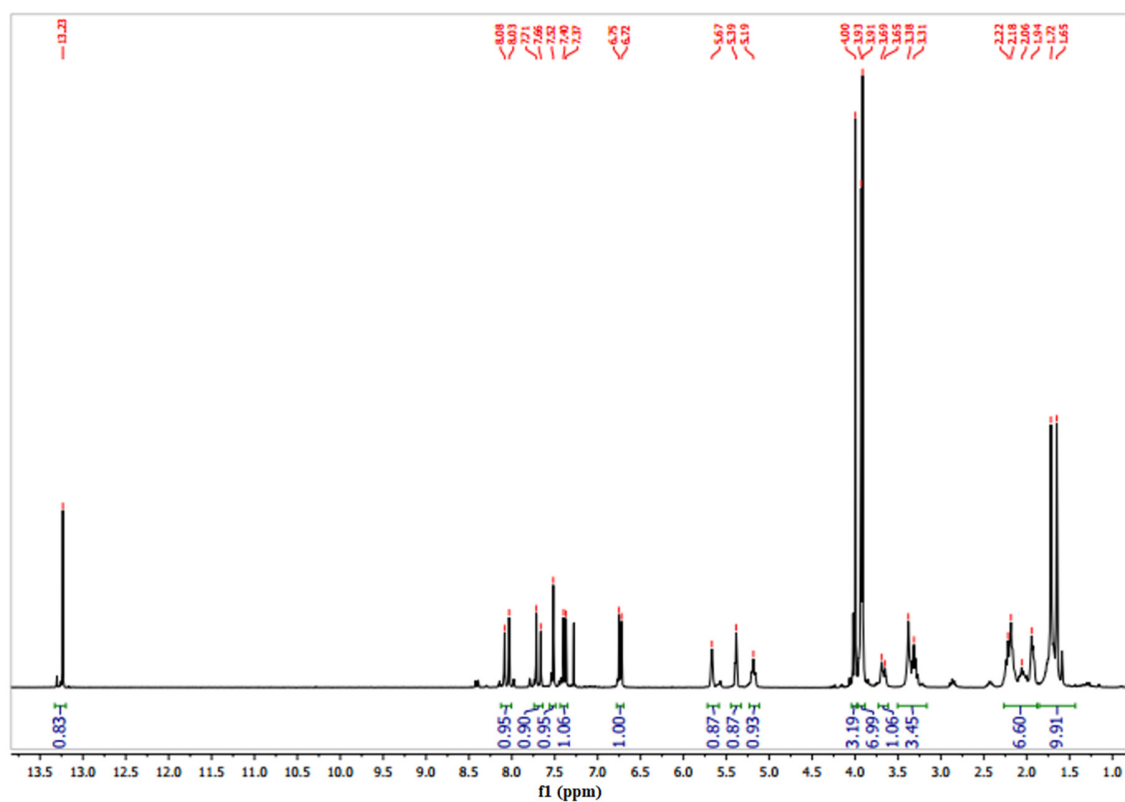

Figure S7. <sup>1</sup>H NMR spectrum of compound 3e.

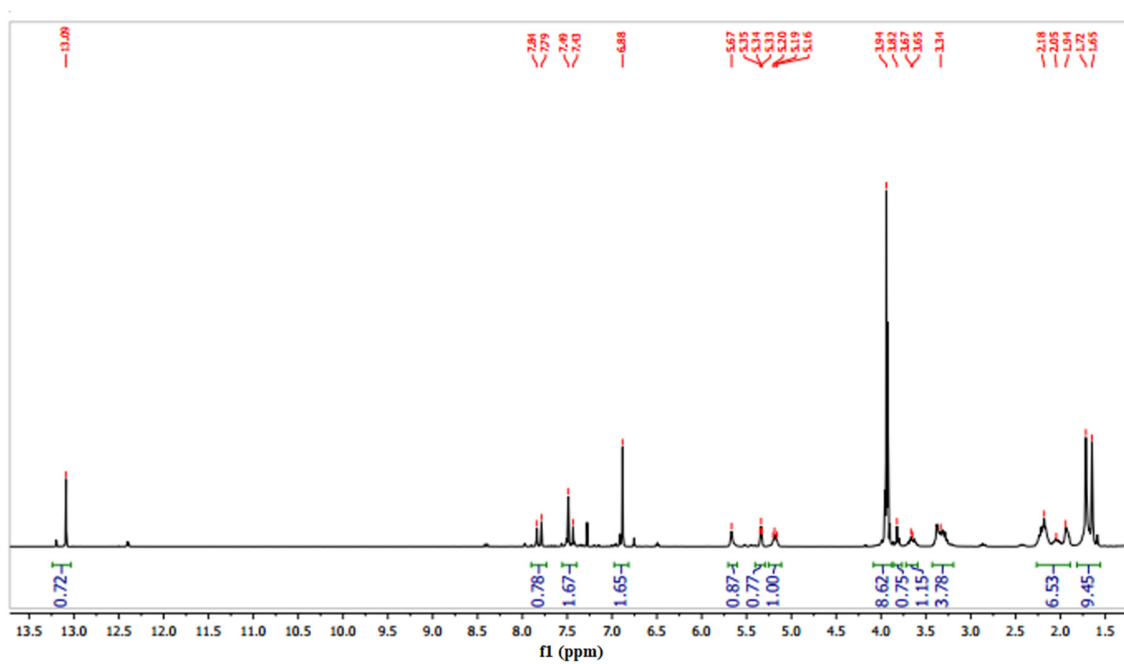

**Figure S8.** <sup>1</sup>H NMR spectrum of compound 3f.

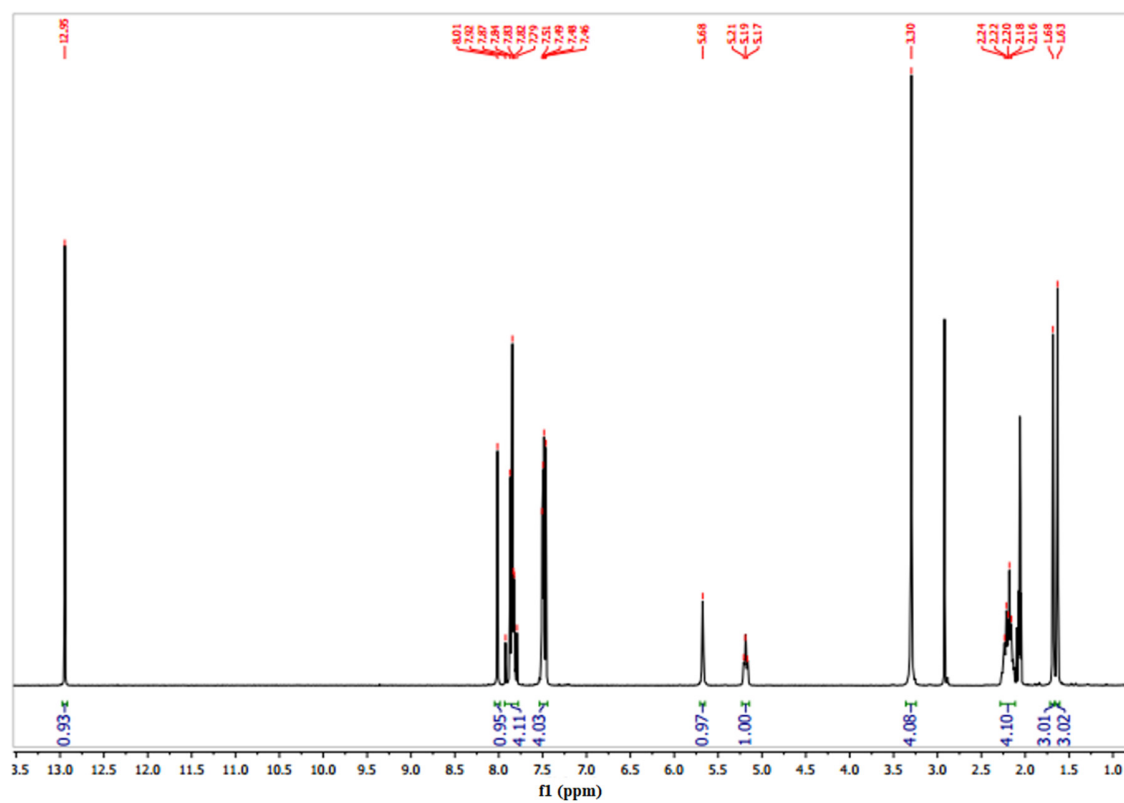

Figure S9. <sup>1</sup>H NMR spectrum of compound 4a.

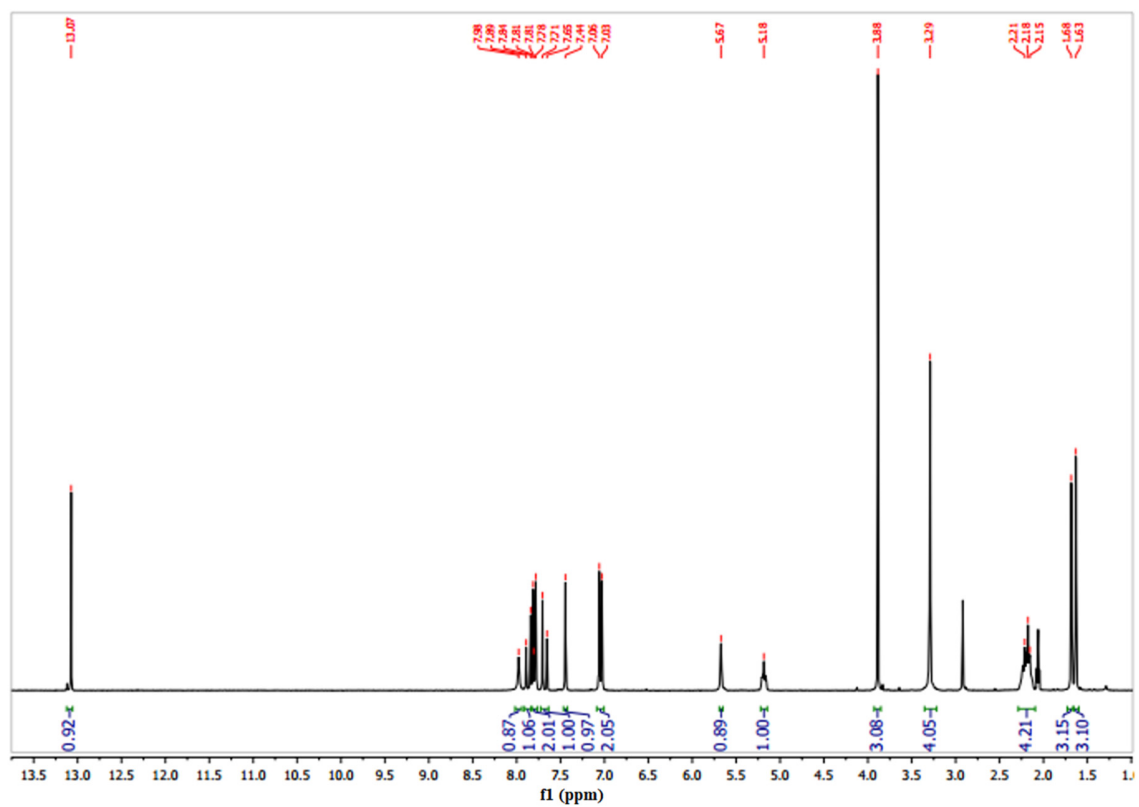

Figure S10. <sup>1</sup>H NMR spectrum of compound 4b.

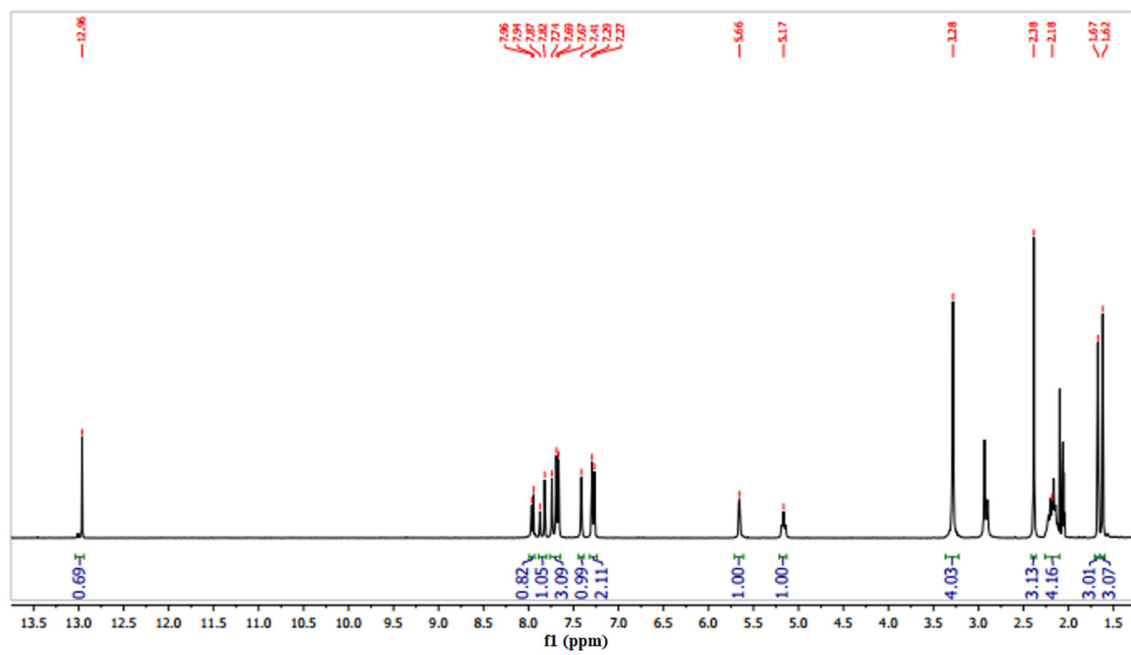

**Figure S11.**  $^1\text{H}$  NMR spectrum of compound **4c**.

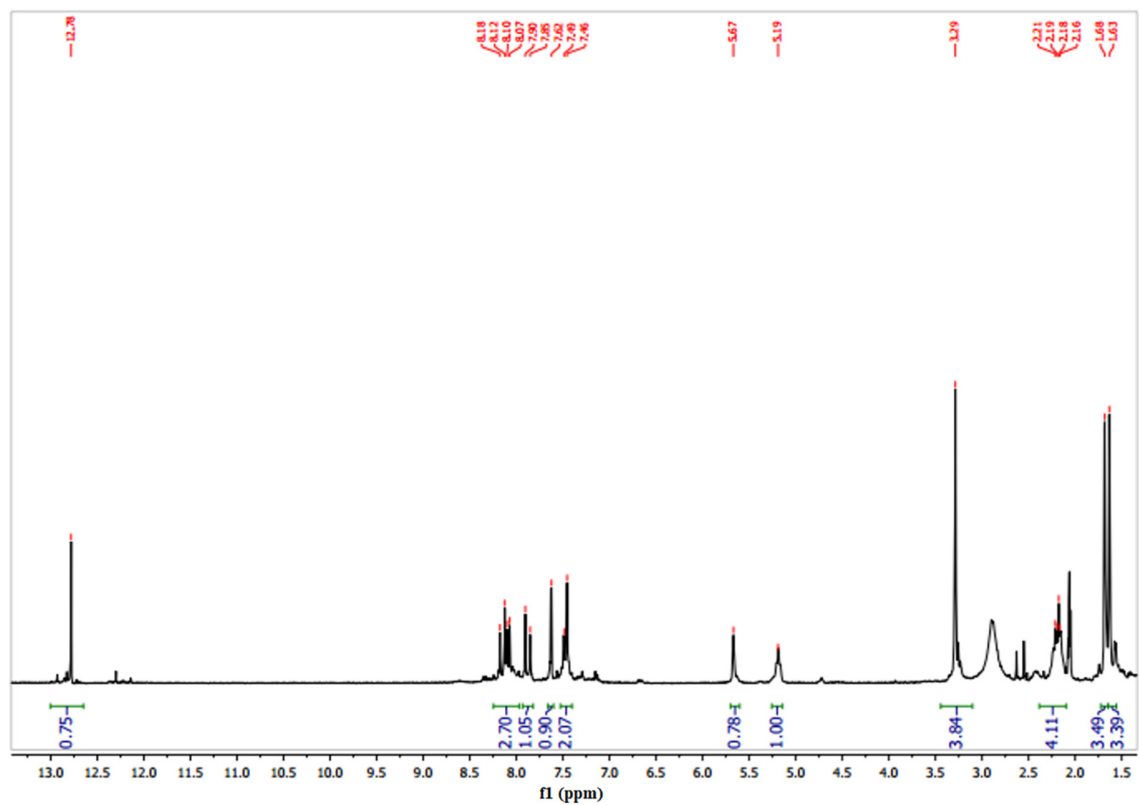

Figure S12.  $^1\text{H}$  NMR spectrum of compound 4d.



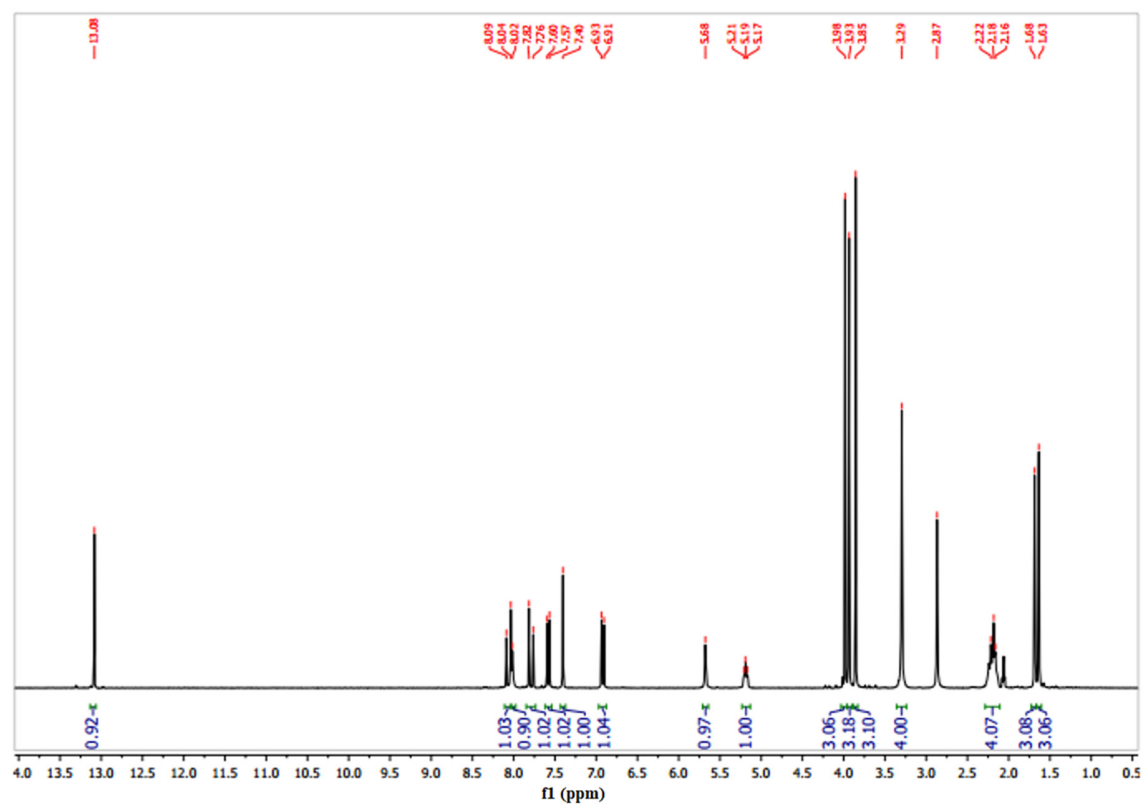

Figure S13. <sup>1</sup>H NMR spectrum of compound 4e.

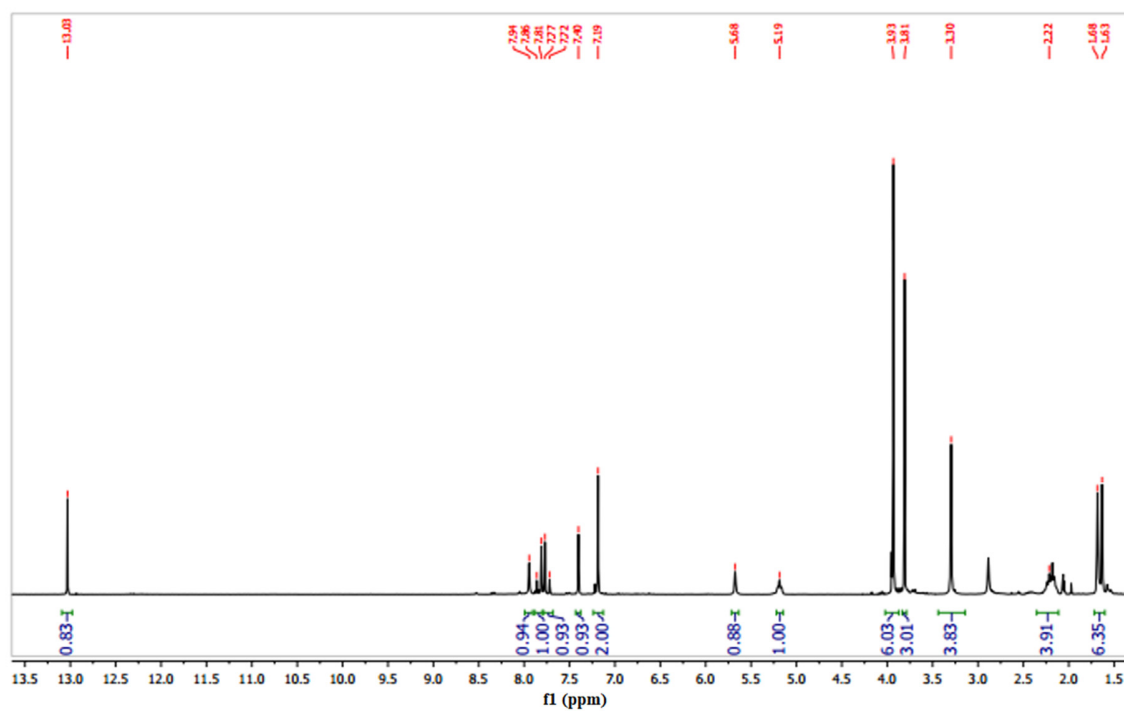

**Figure S14.** <sup>1</sup>H NMR spectrum of compound 4f.

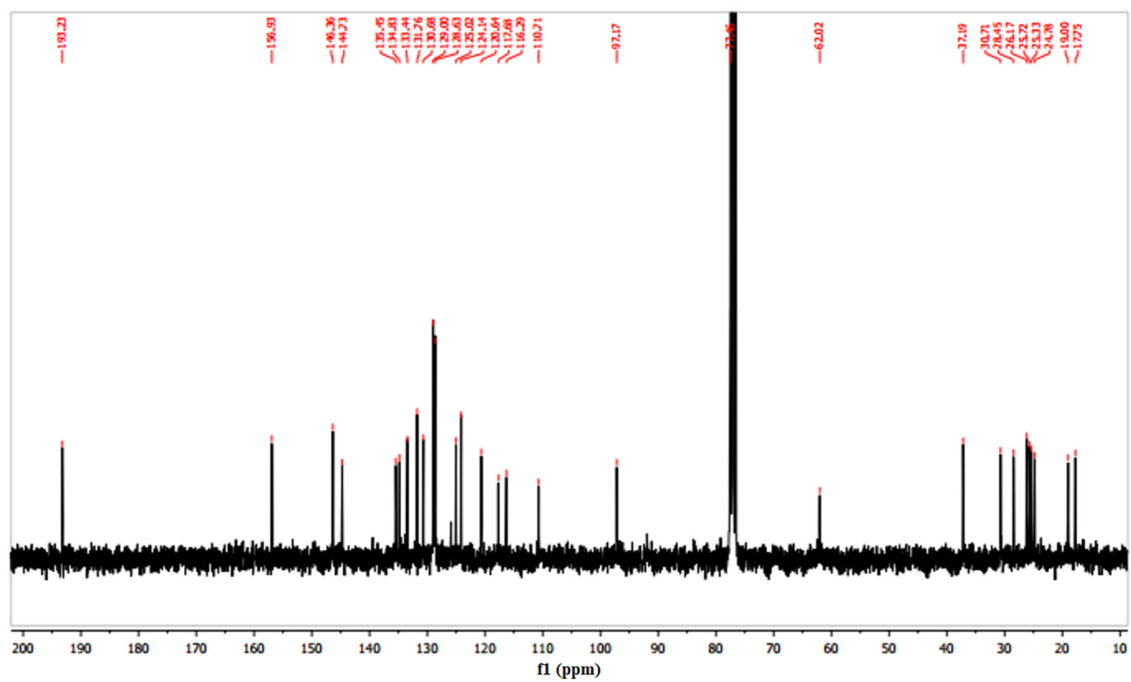

Figure S15.  $^{13}\text{C}$  NMR spectrum of compound 3a.

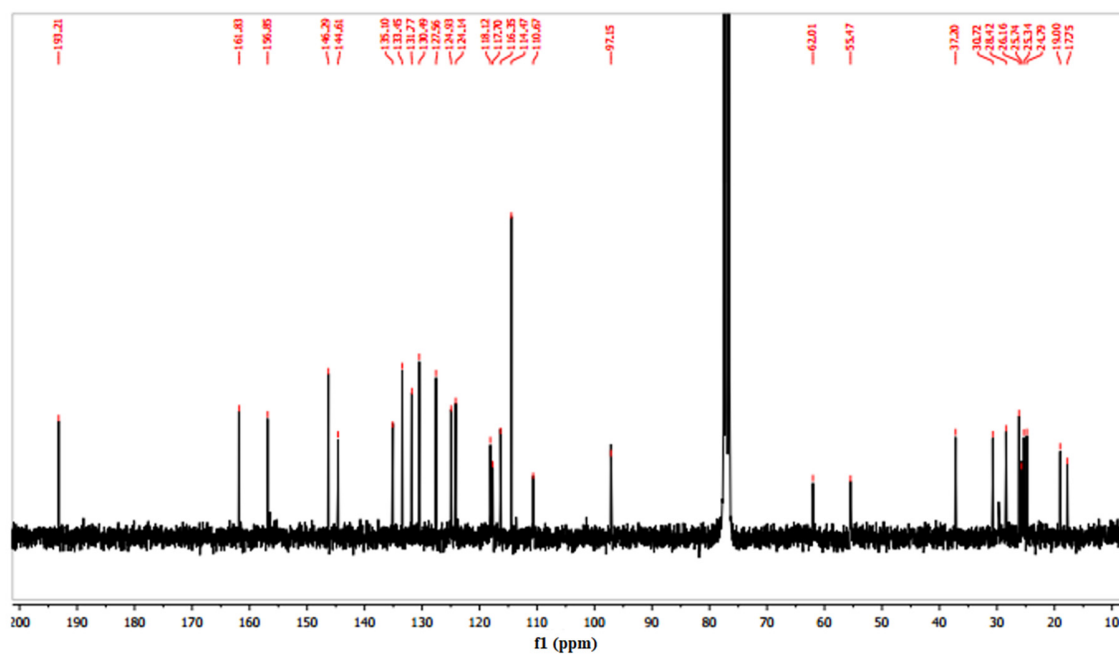

Figure S16.  $^{13}\text{C}$  NMR spectrum of compound **3b**.

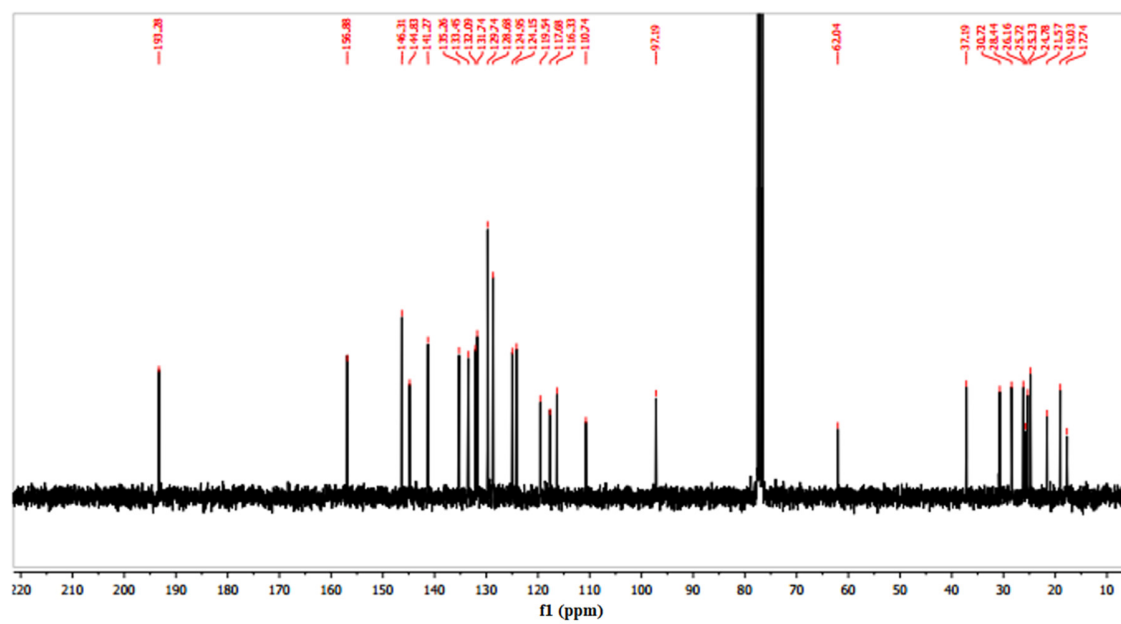

Figure S17.  $^{13}\text{C}$  NMR spectrum of compound 3c.

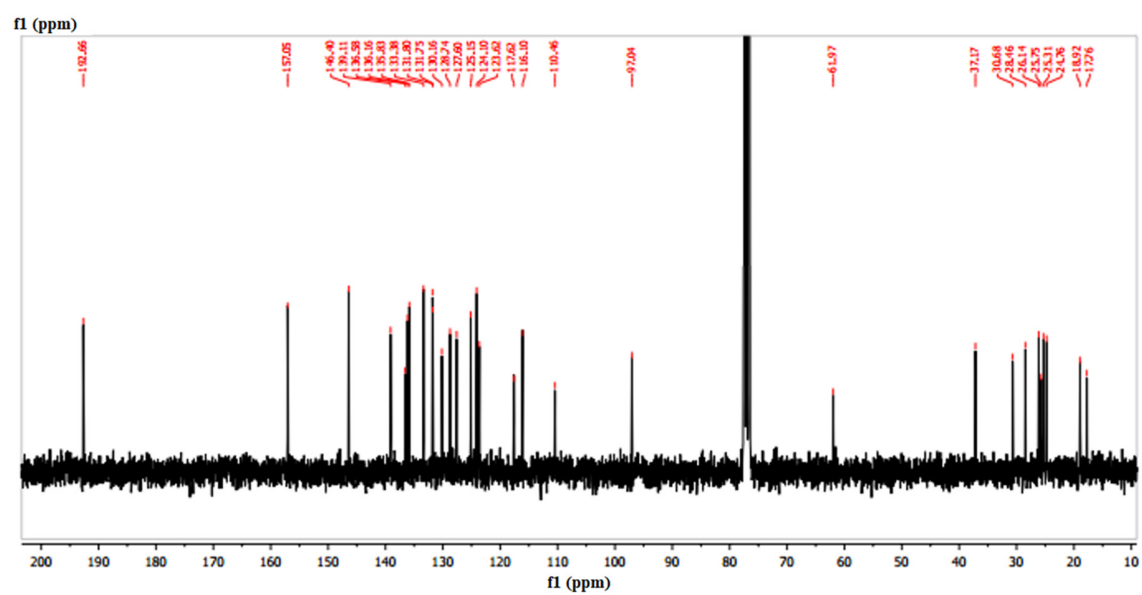

Figure S18.  $^{13}\text{C}$  NMR spectrum of compound **3d**.

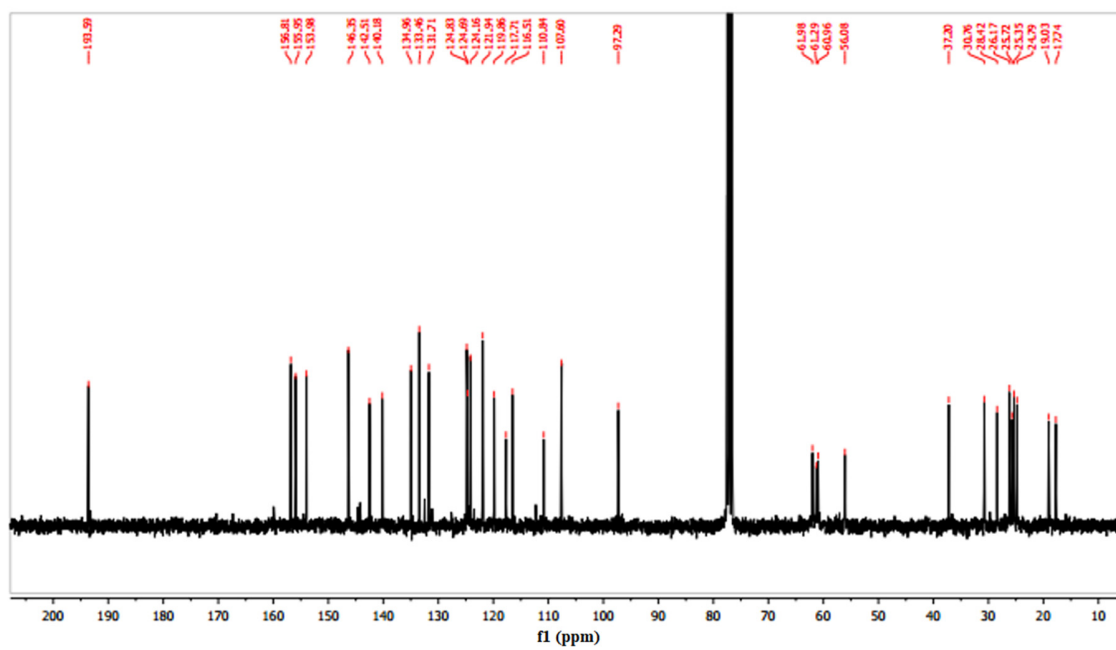

Figure S19. <sup>13</sup>C NMR spectrum of compound 3e.

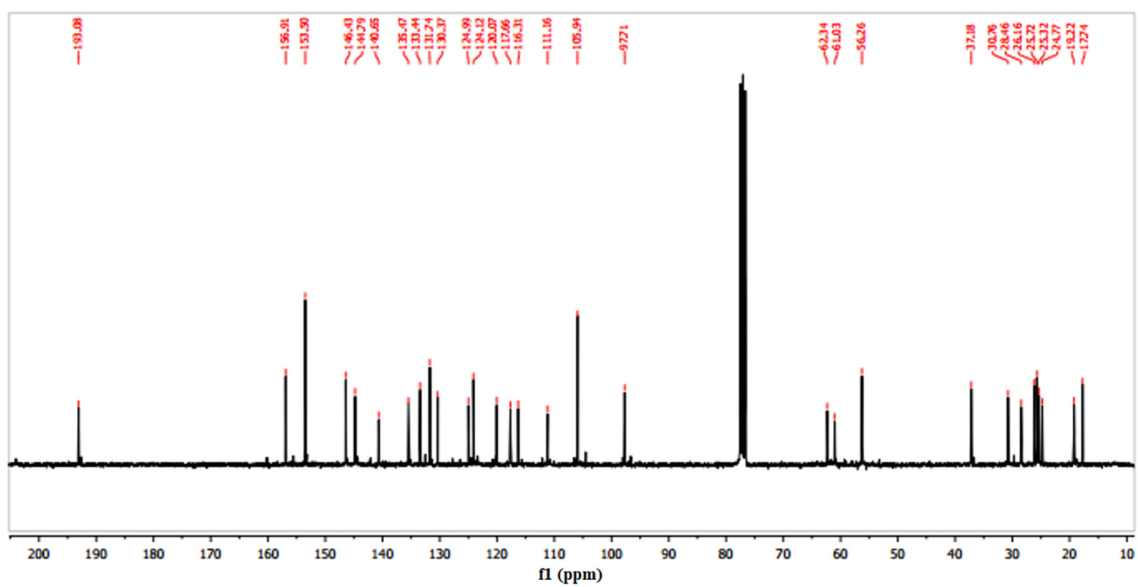

**Figure S20.** <sup>13</sup>C NMR spectrum of compound 3f.



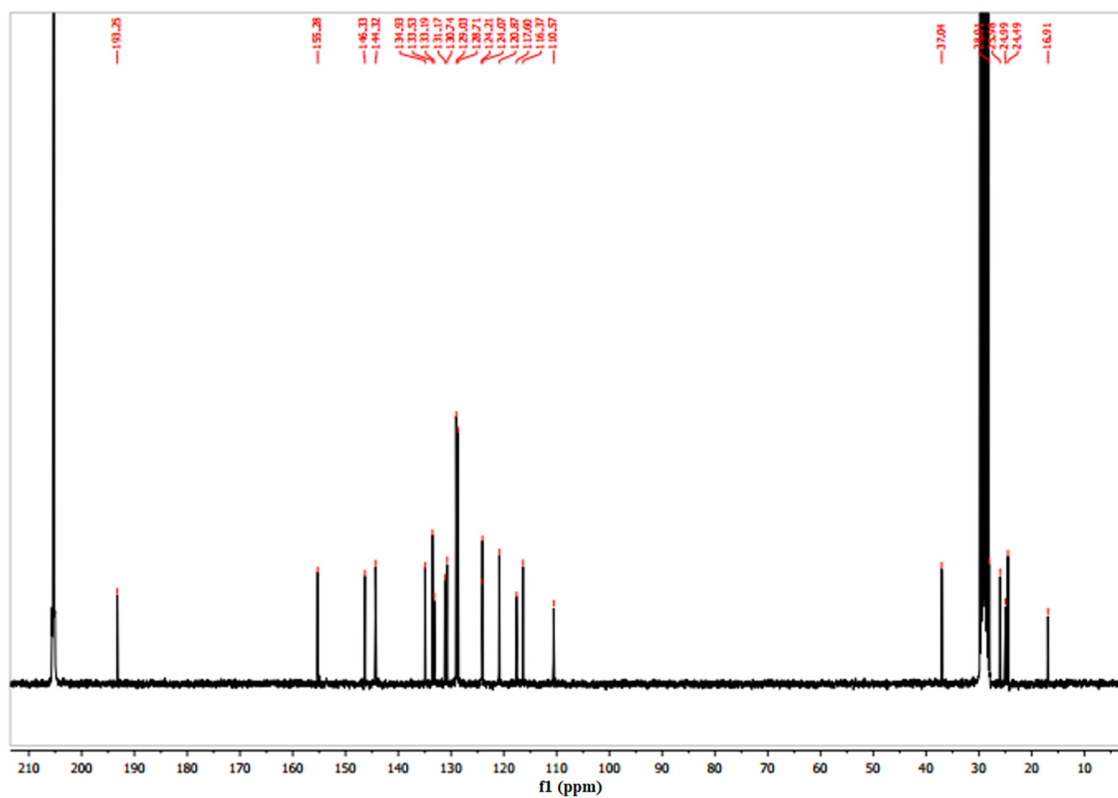

**Figure S21.**  $^{13}\text{C}$  NMR spectrum of compound 4a.

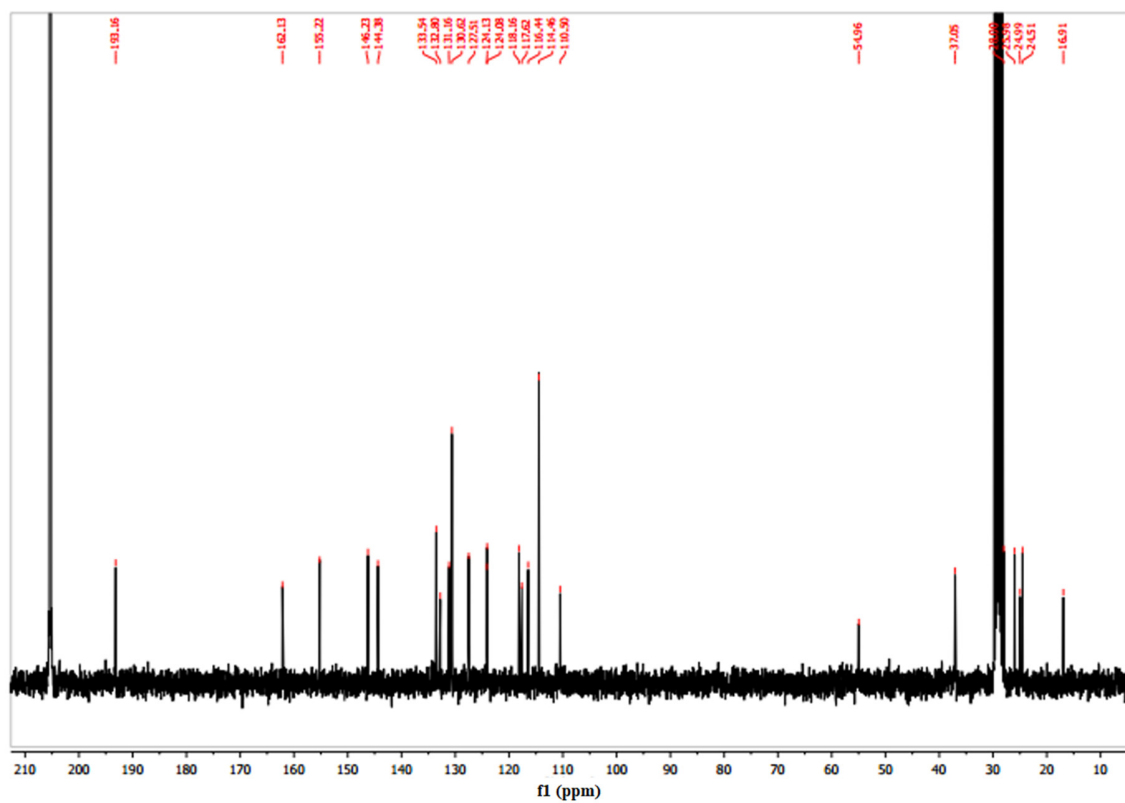

**Figure S22.**  $^{13}\text{C}$  NMR spectrum of compound **4b**.

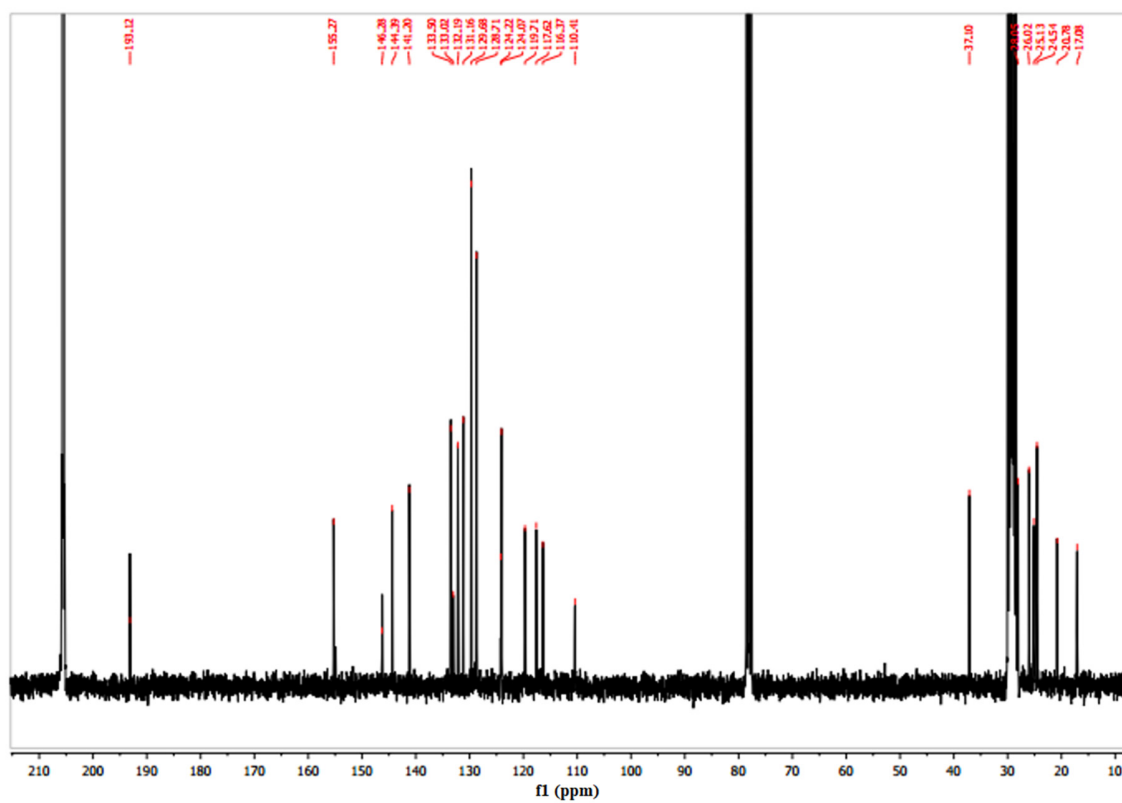

**Figure S23.** <sup>13</sup>C NMR spectrum of compound 4c.

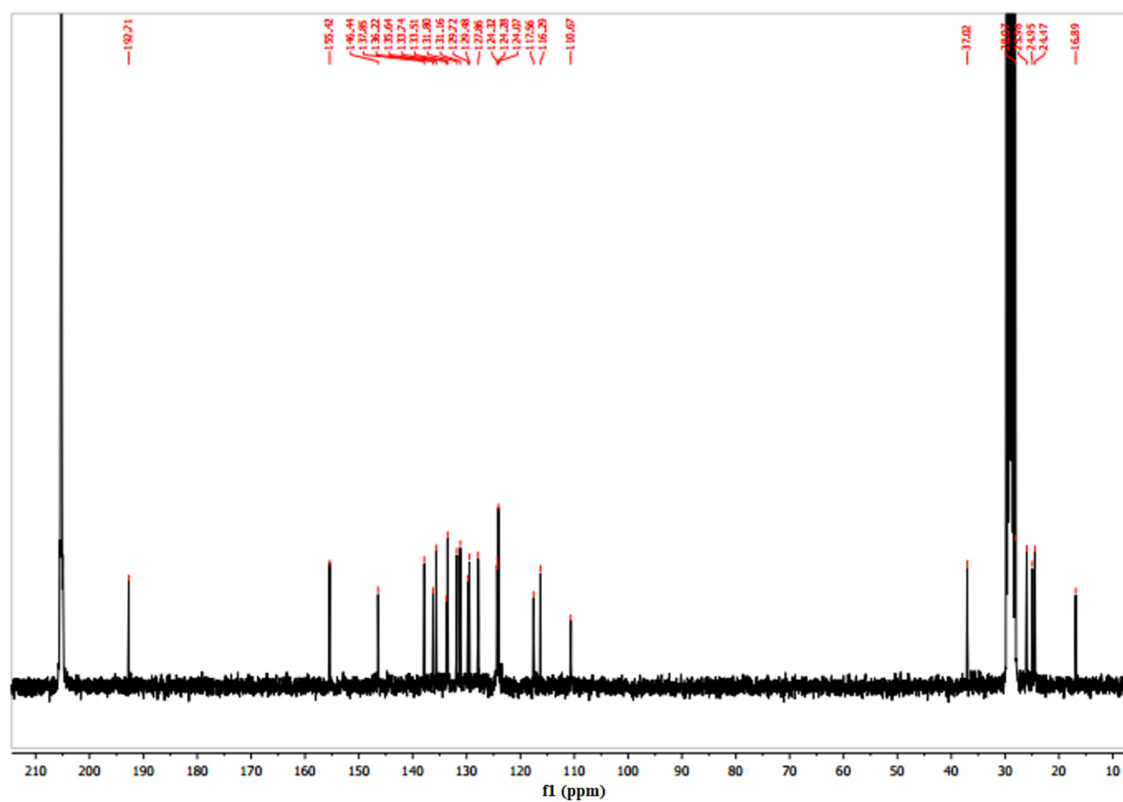

**Figure S24.** <sup>13</sup>C NMR spectrum of compound 4d.

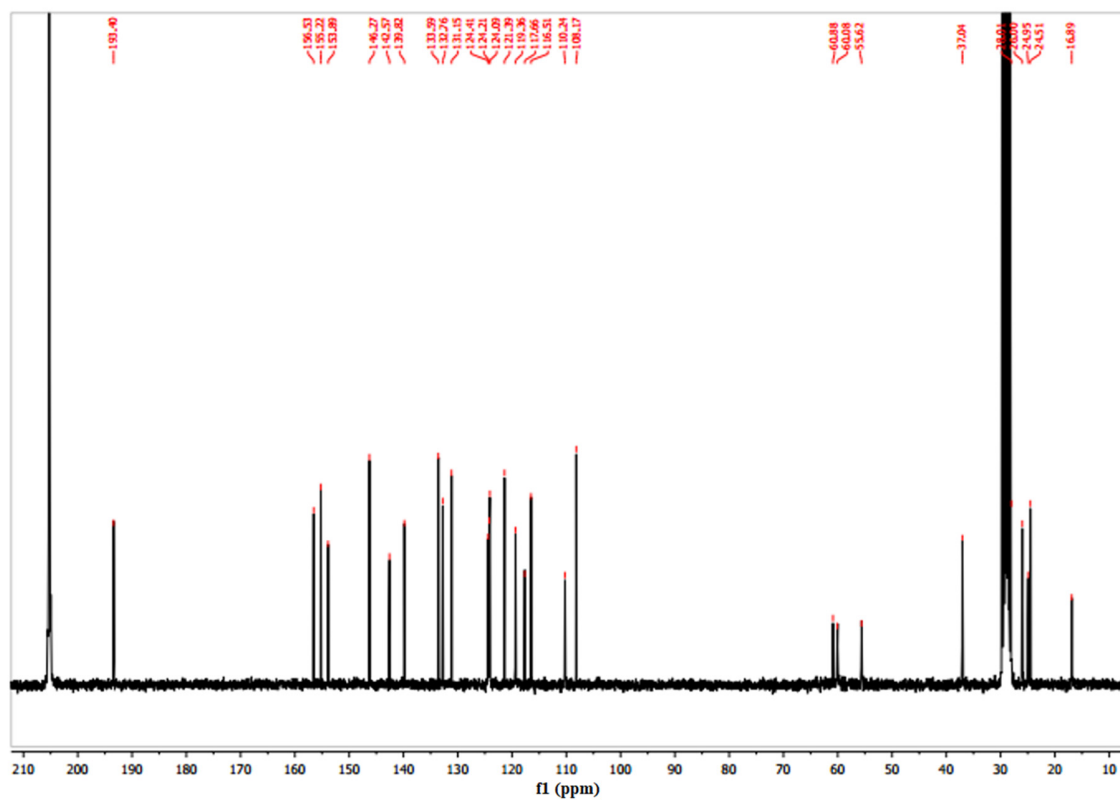

Figure S25.  $^{13}\text{C}$  NMR spectrum of compound 4e.

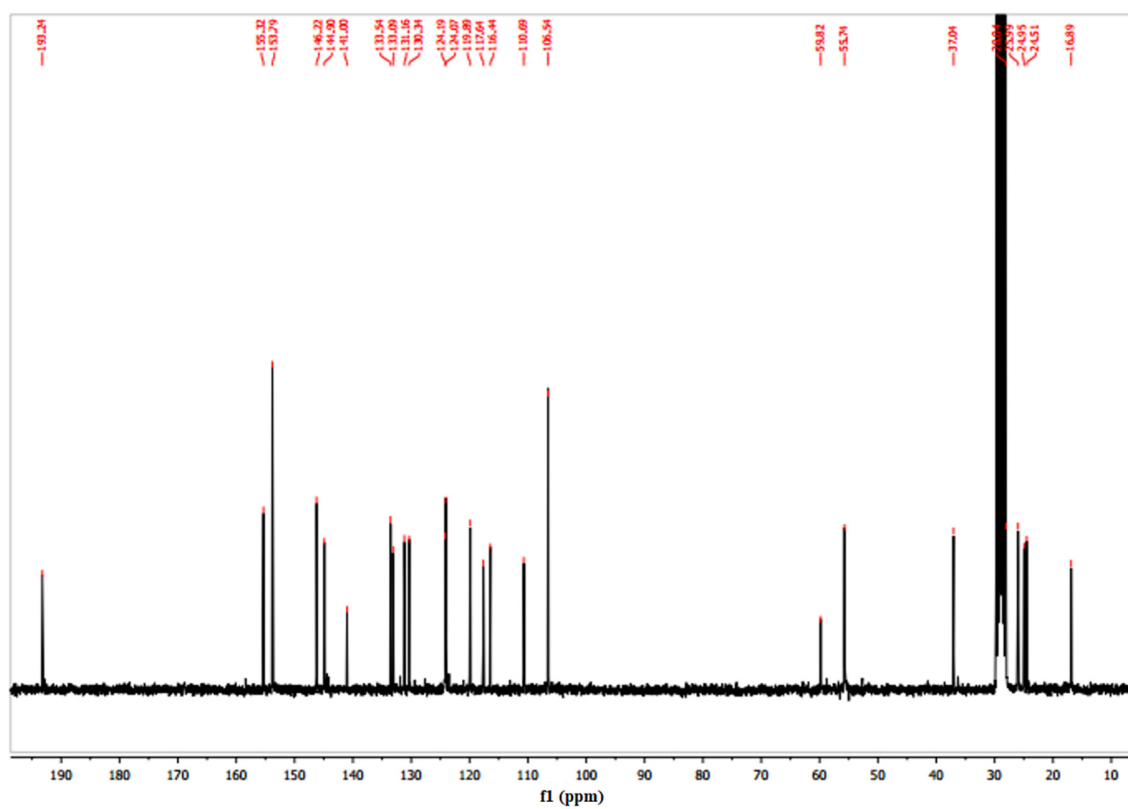

**Figure S26.**  $^{13}\text{C}$  NMR spectrum of compound 4f.

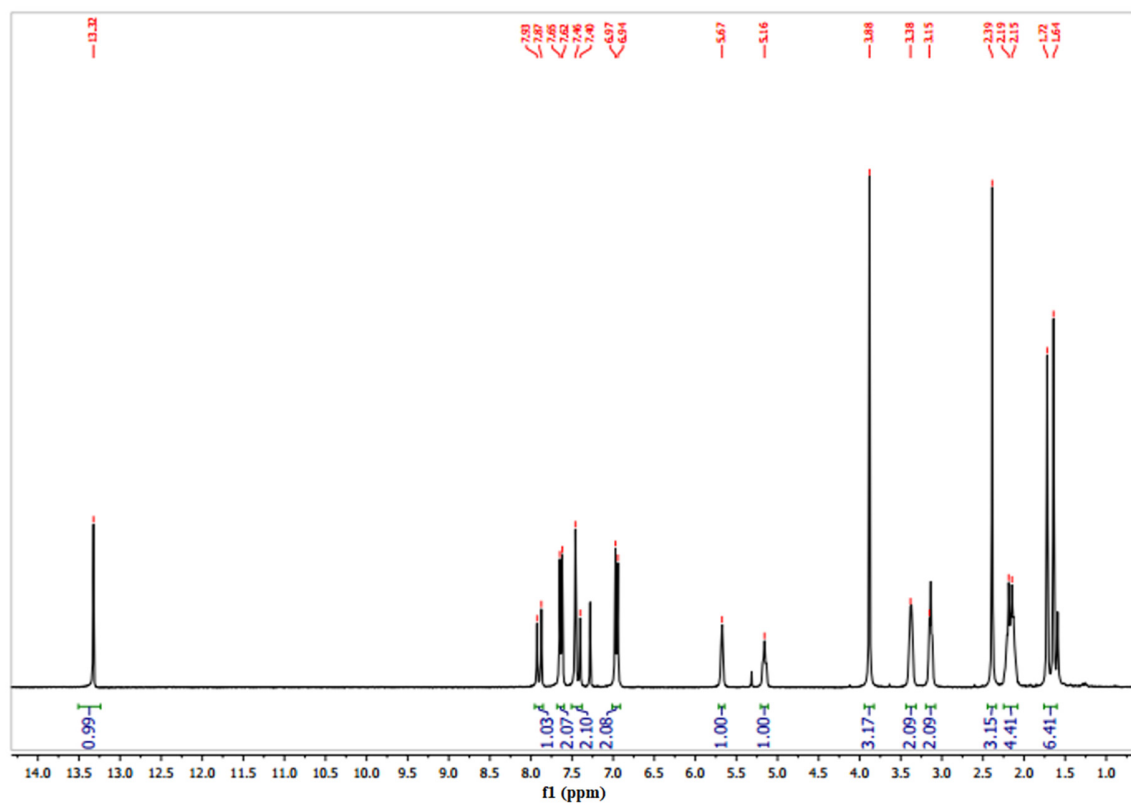

Figure S27. <sup>1</sup>H NMR spectrum of compound 5'b.

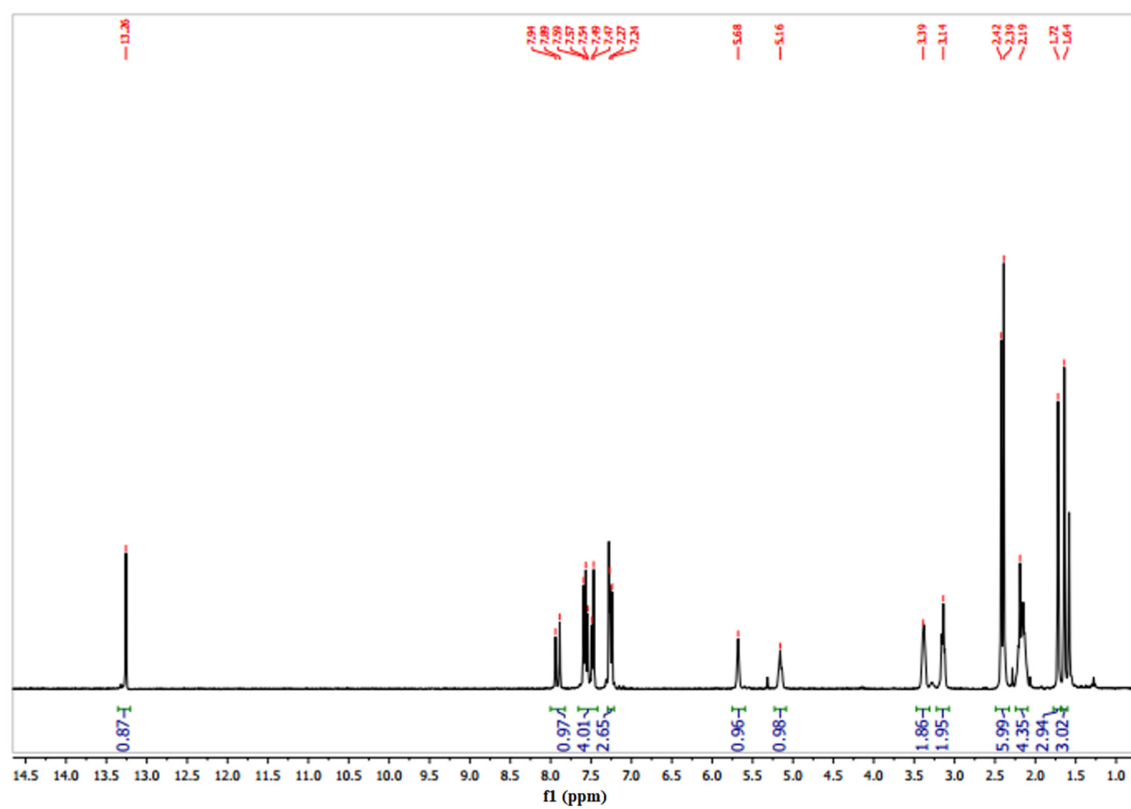

**Figure S28.** <sup>1</sup>H NMR spectrum of compound 5'c.



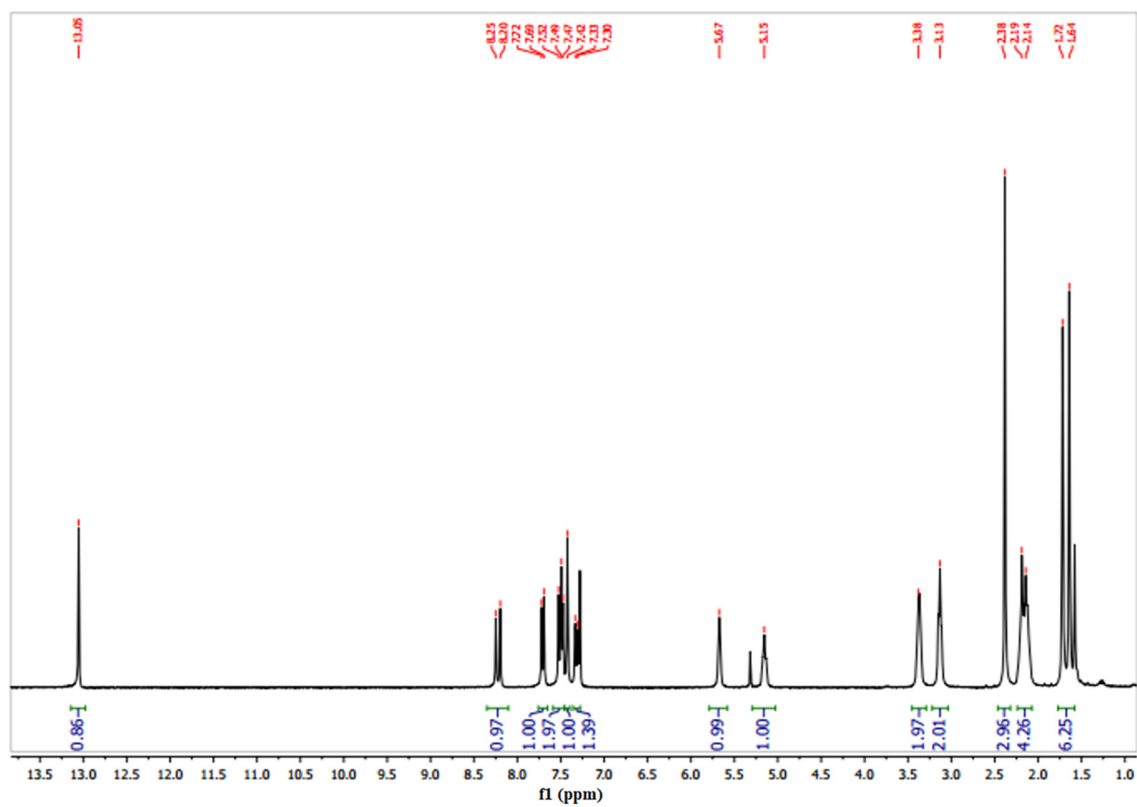

Figure S29. <sup>1</sup>H NMR spectrum of compound 5'd.

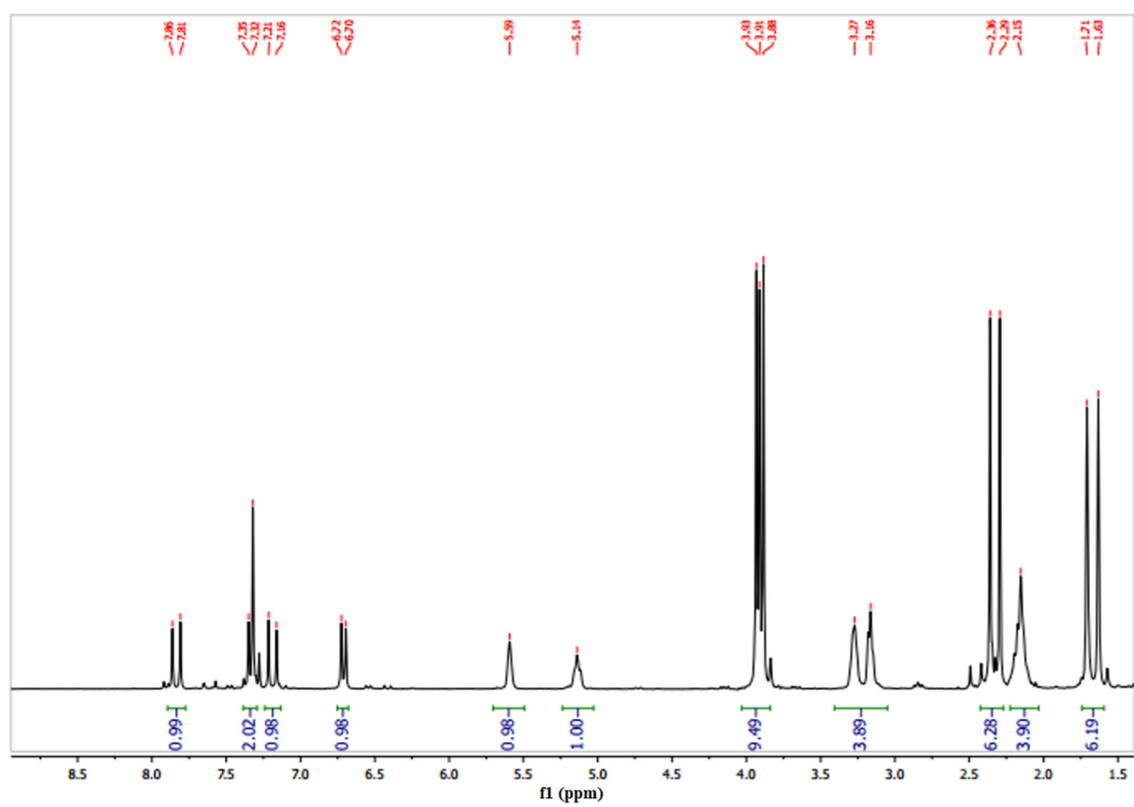

**Figure S30.**  $^1\text{H}$  NMR spectrum of compound 5e.

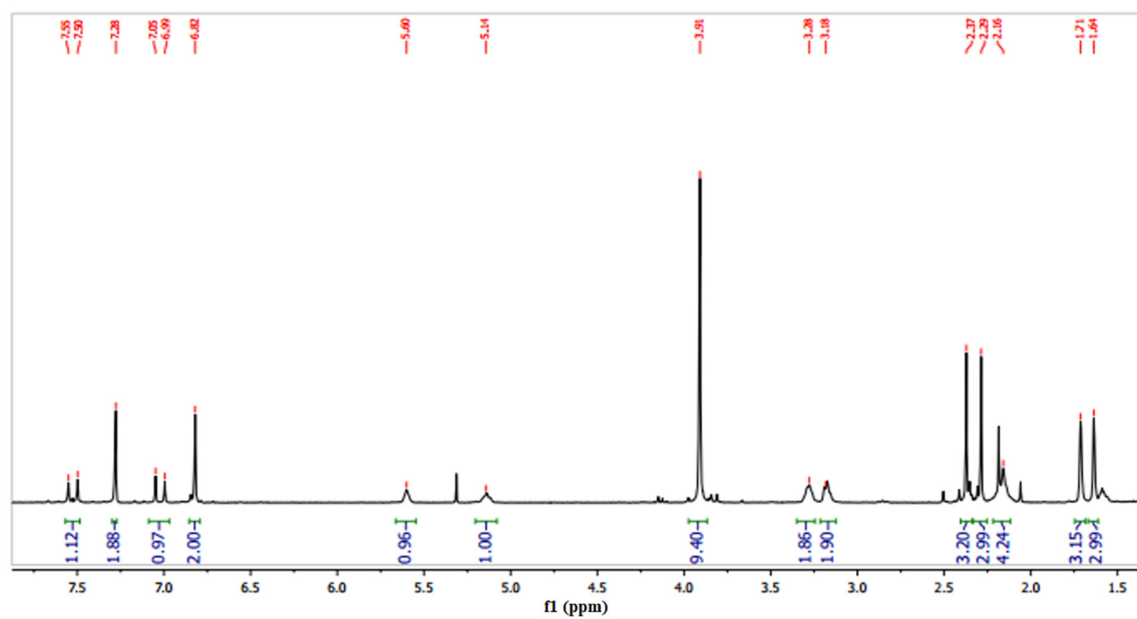

**Figure S31.** <sup>1</sup>H NMR spectrum of compound 5f.

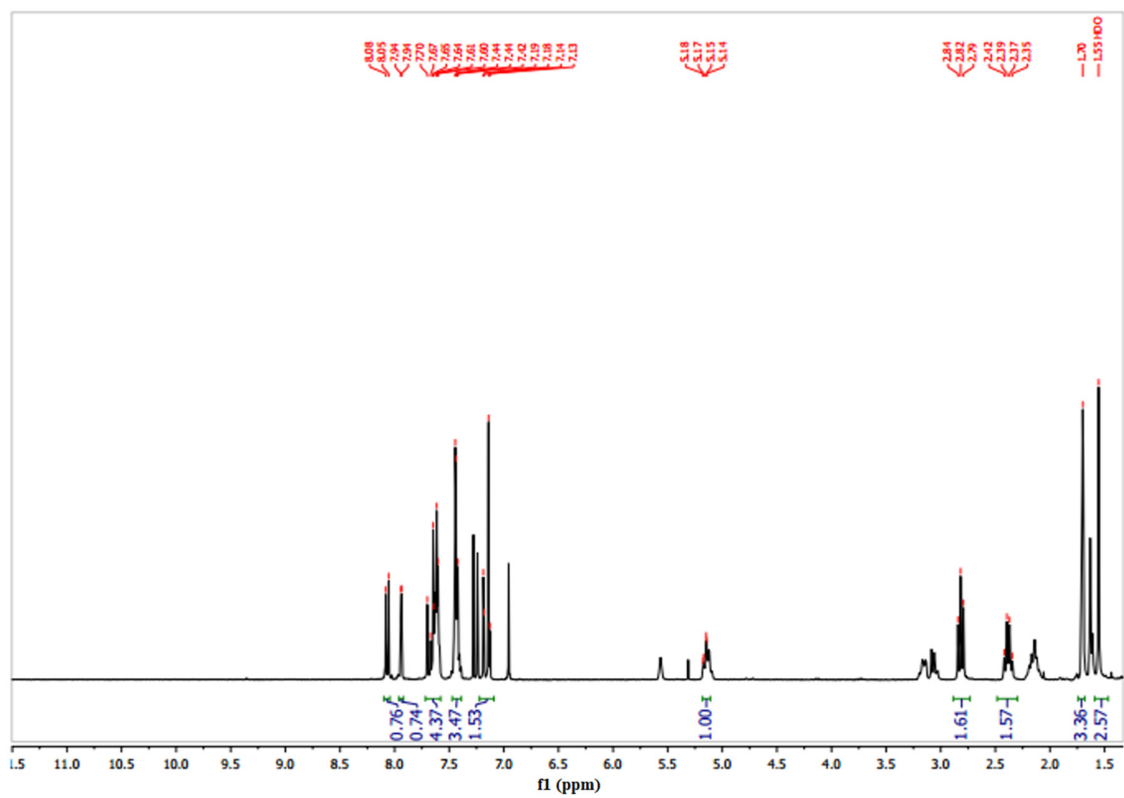

**Figure S32.** <sup>1</sup>H NMR spectrum of compound 6a.

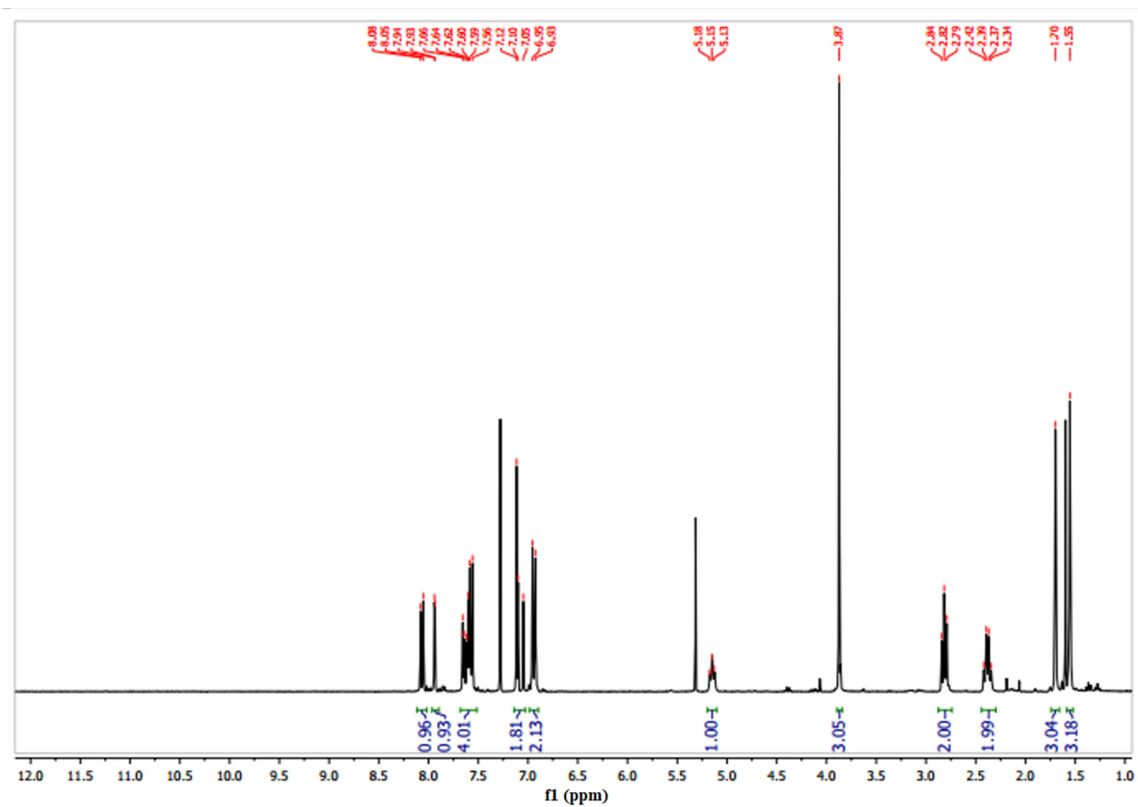

Figure S33. <sup>1</sup>H NMR spectrum of compound **6b**.

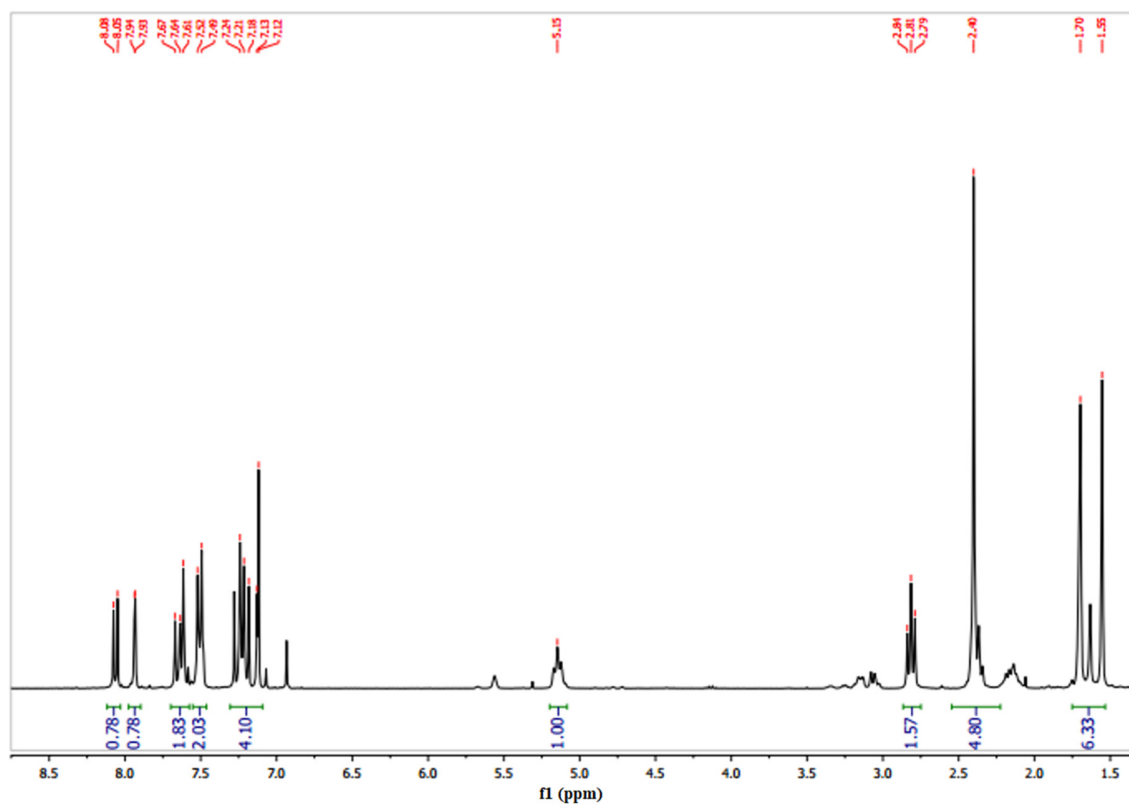

**Figure S34.** <sup>1</sup>H NMR spectrum of compound 6c.

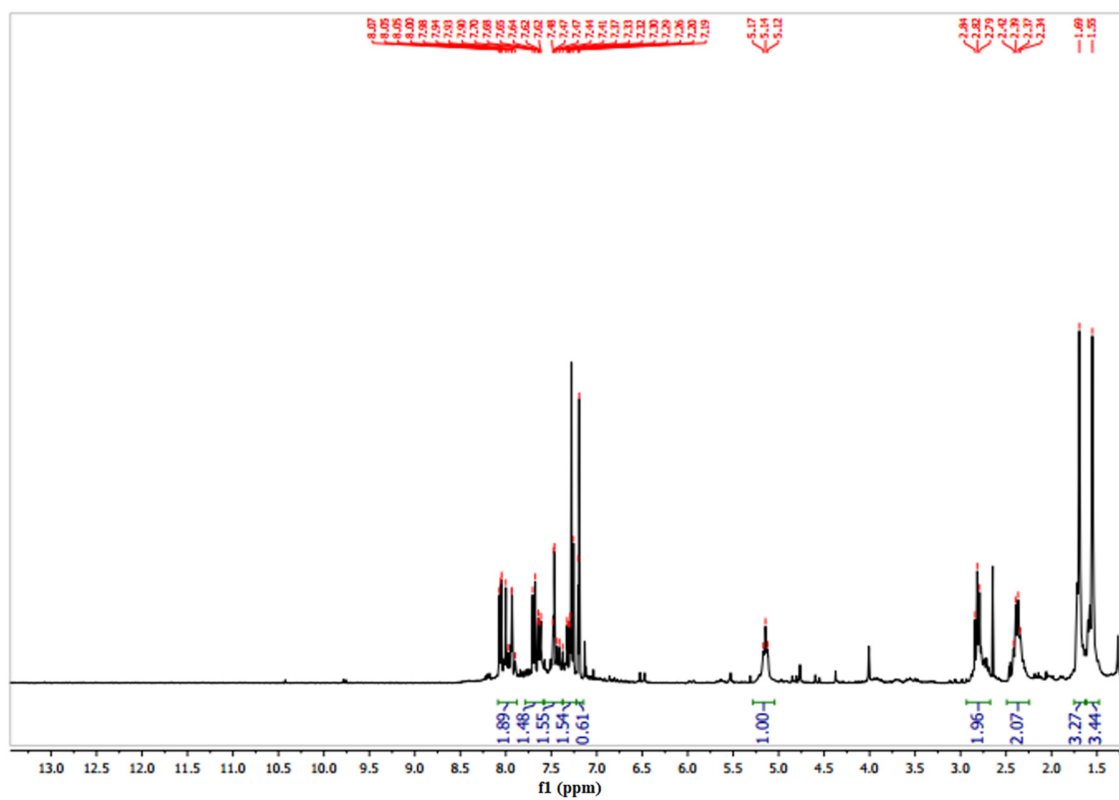

Figure S35. <sup>1</sup>H NMR spectrum of compound 6d.

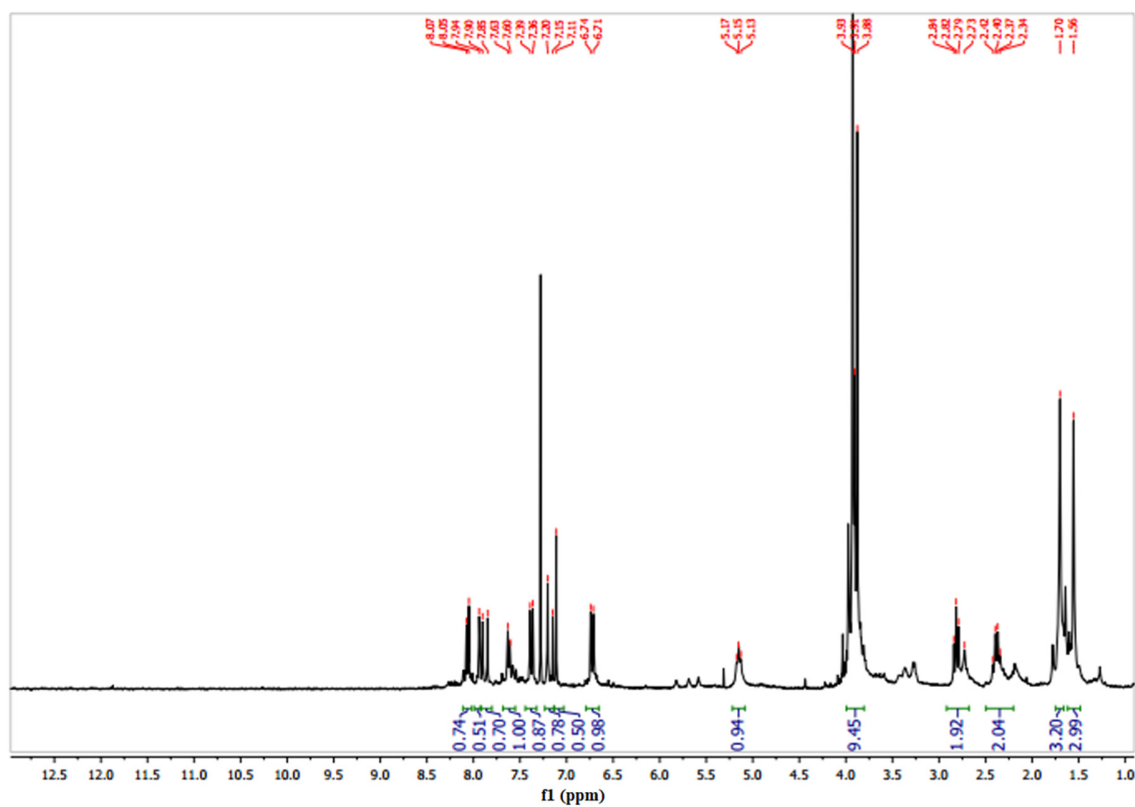

**Figure S36.** <sup>1</sup>H NMR spectrum of compound 6e.



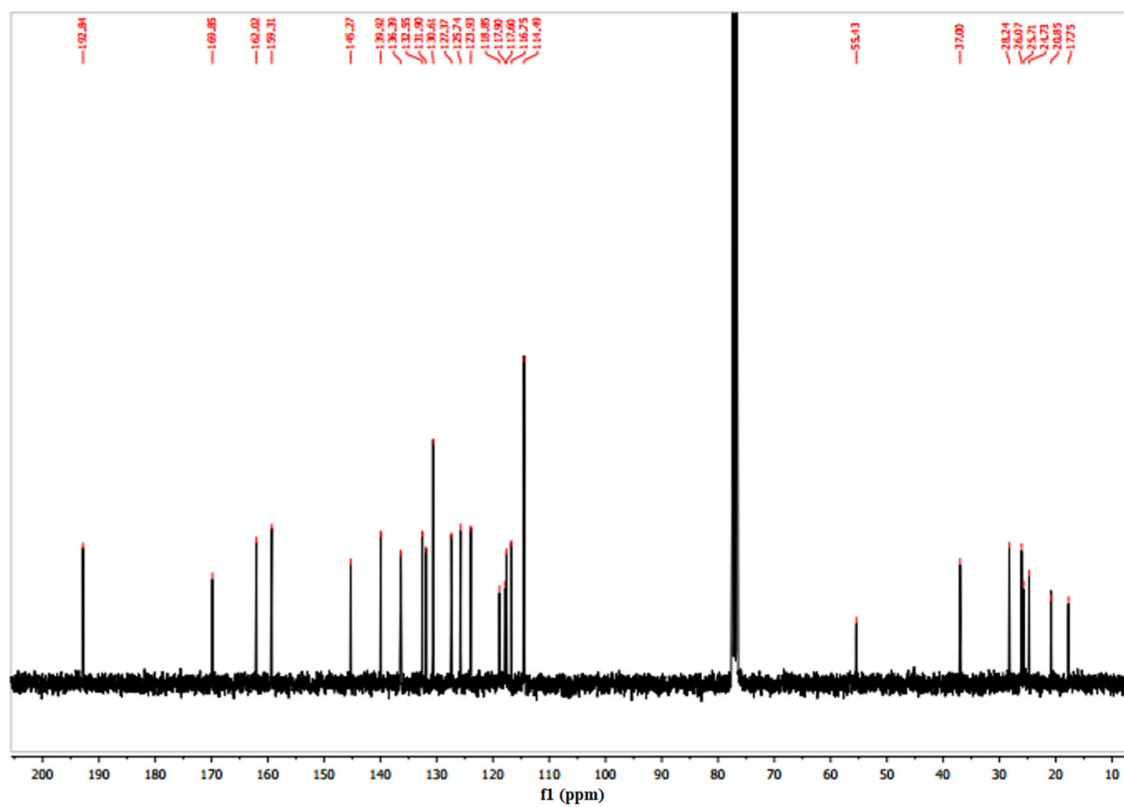

Figure S37. <sup>13</sup>C NMR spectrum of compound 5'b.

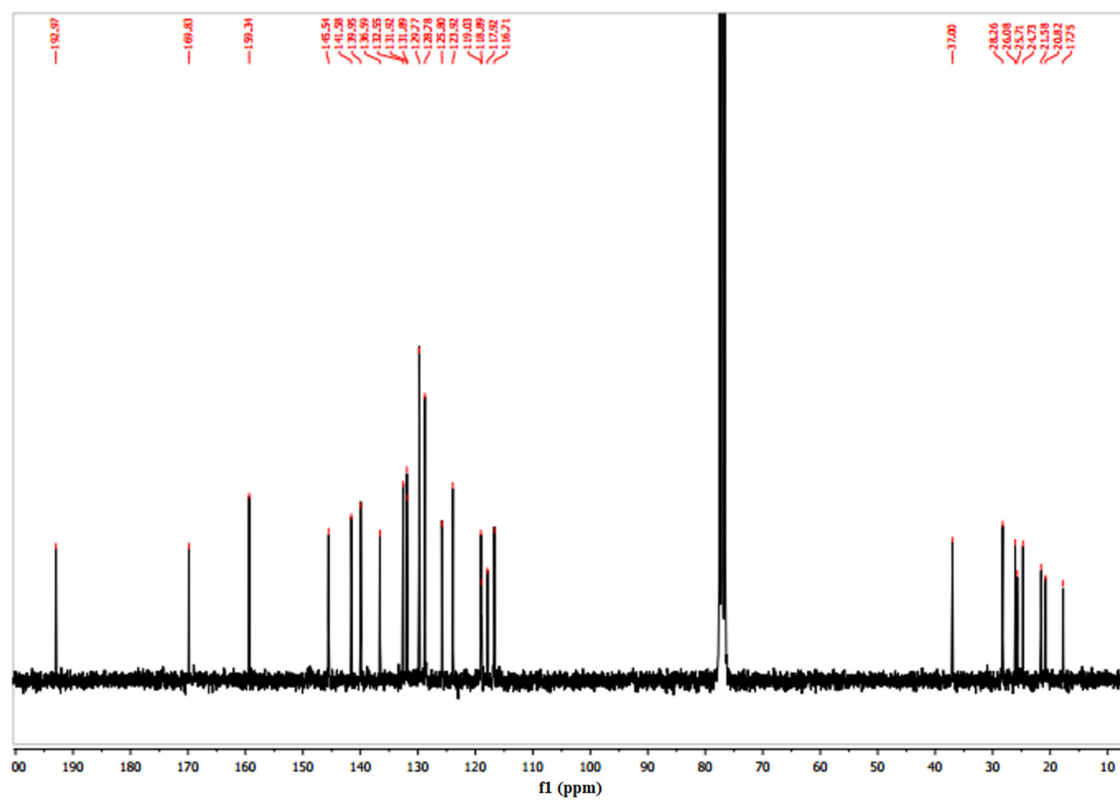

**Figure S38.** <sup>13</sup>C NMR spectrum of compound 5'c.

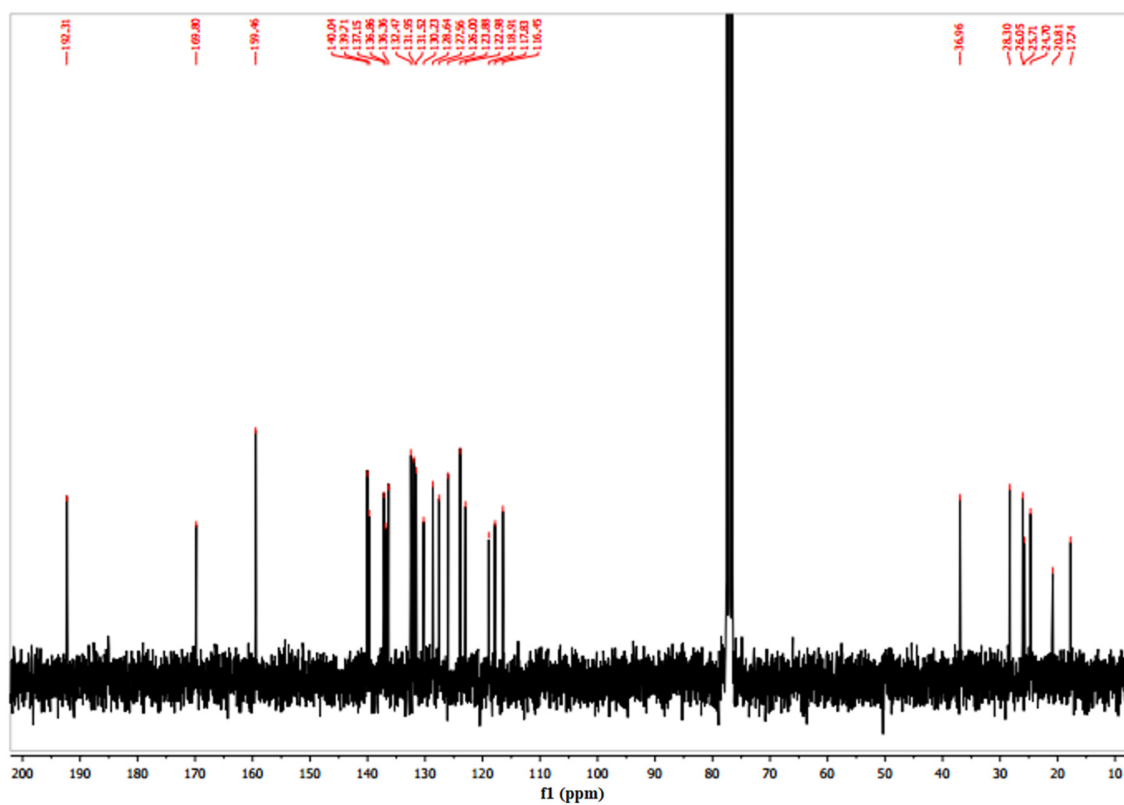

Figure S39. <sup>13</sup>C NMR spectrum of compound 5' d.

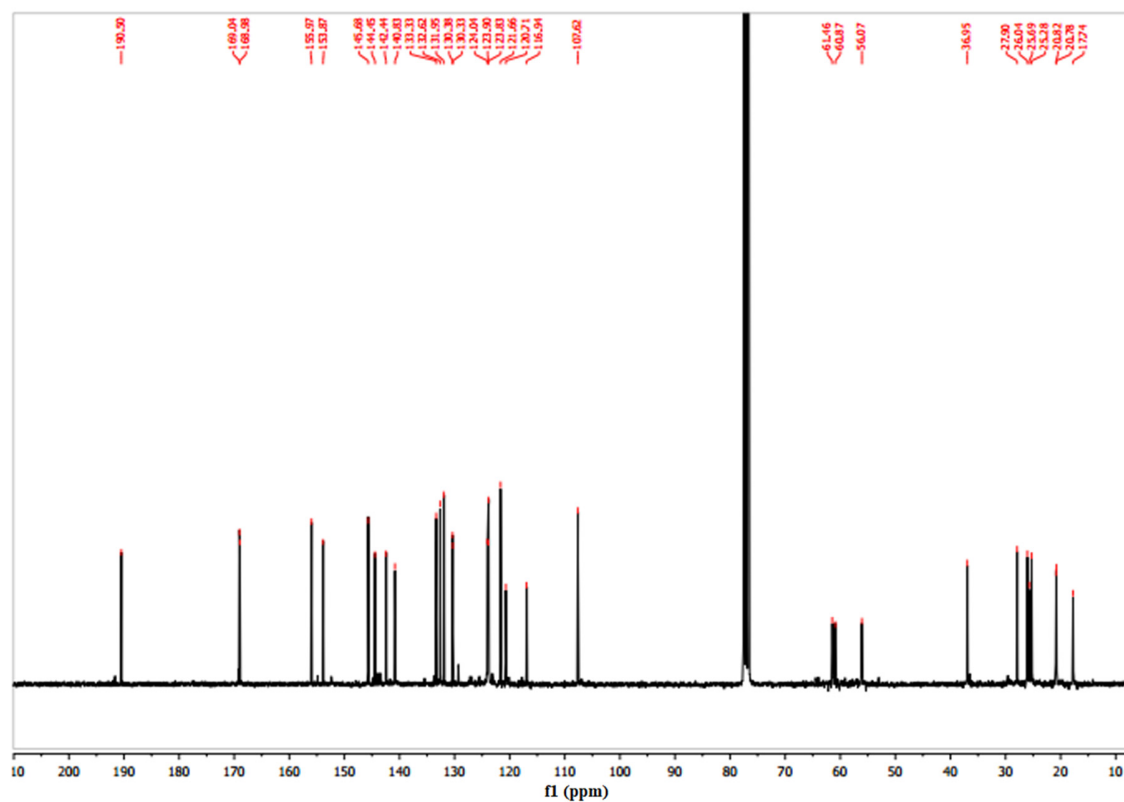

Figure S40.  $^{13}\text{C}$  NMR spectrum of compound 5e.

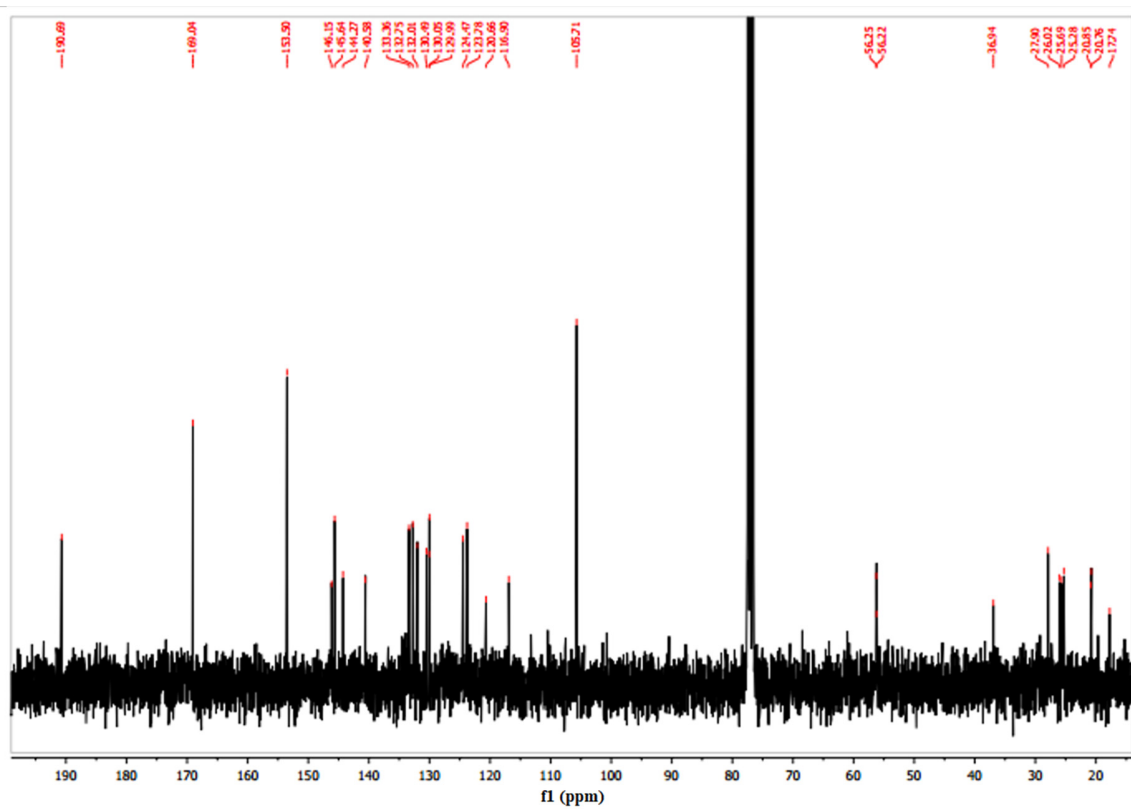

Figure S41. <sup>13</sup>C NMR spectrum of compound 5f.

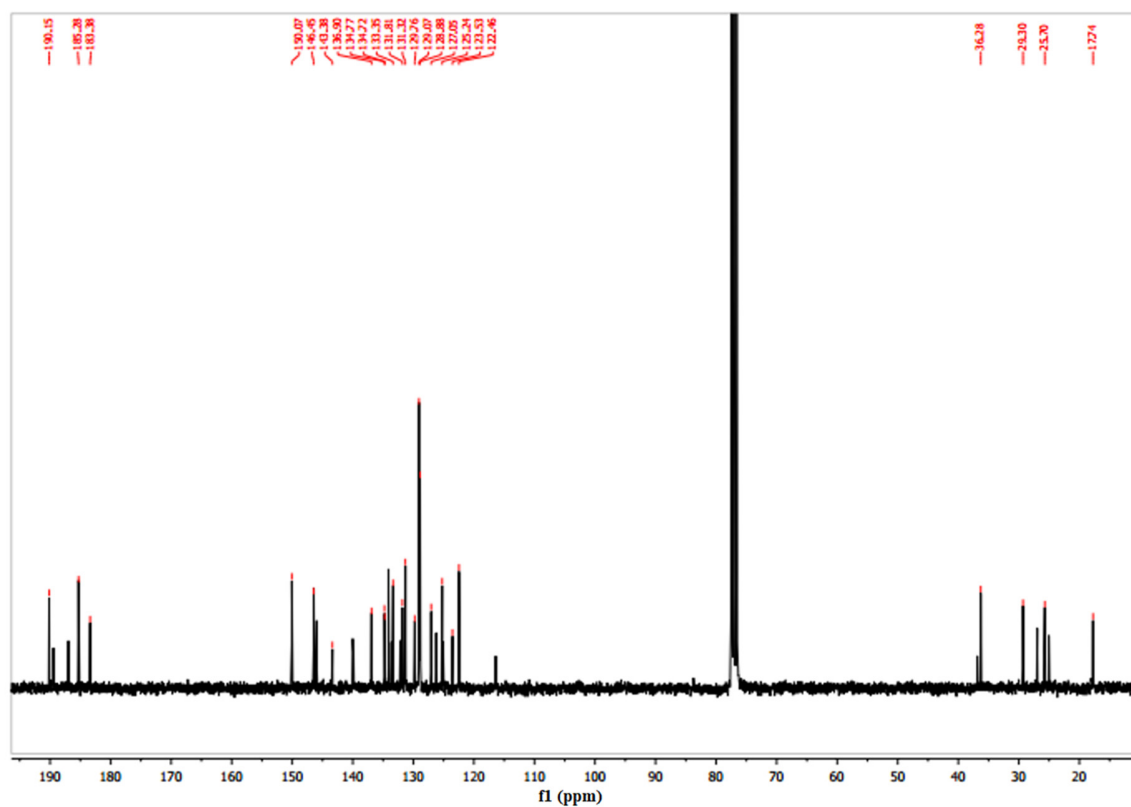

Figure S42. <sup>13</sup>C NMR spectrum of compound 6a.

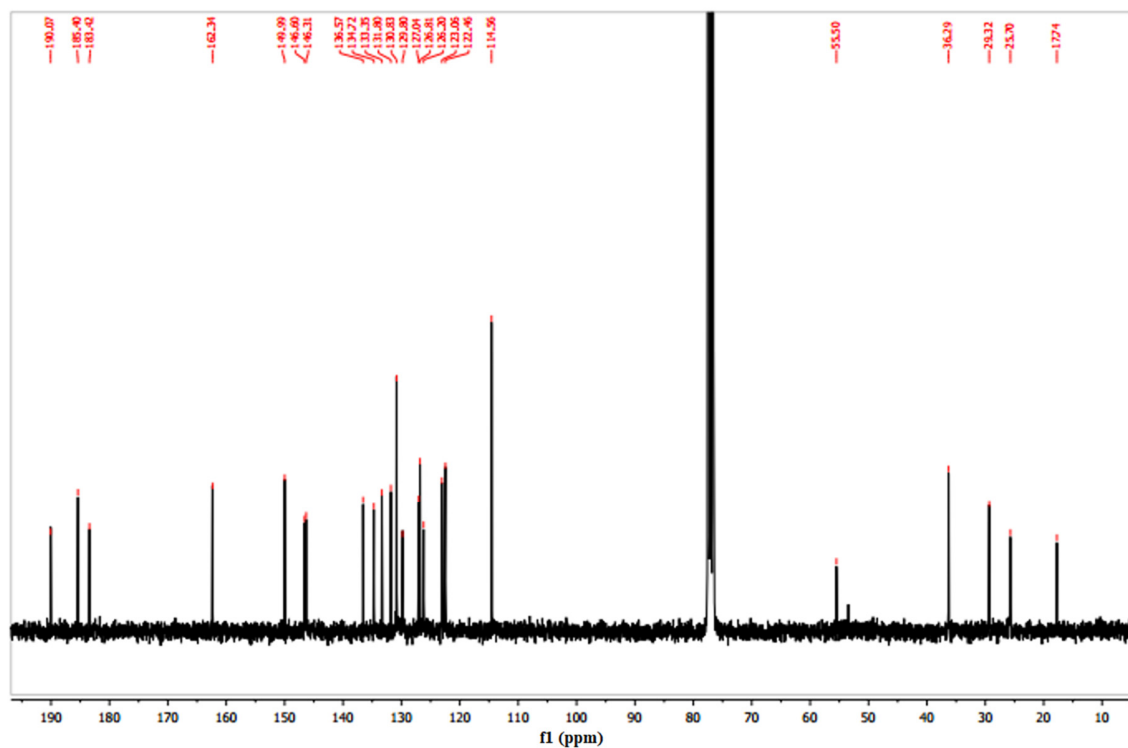

Figure S43.  $^{13}\text{C}$  NMR spectrum of compound **6b**.

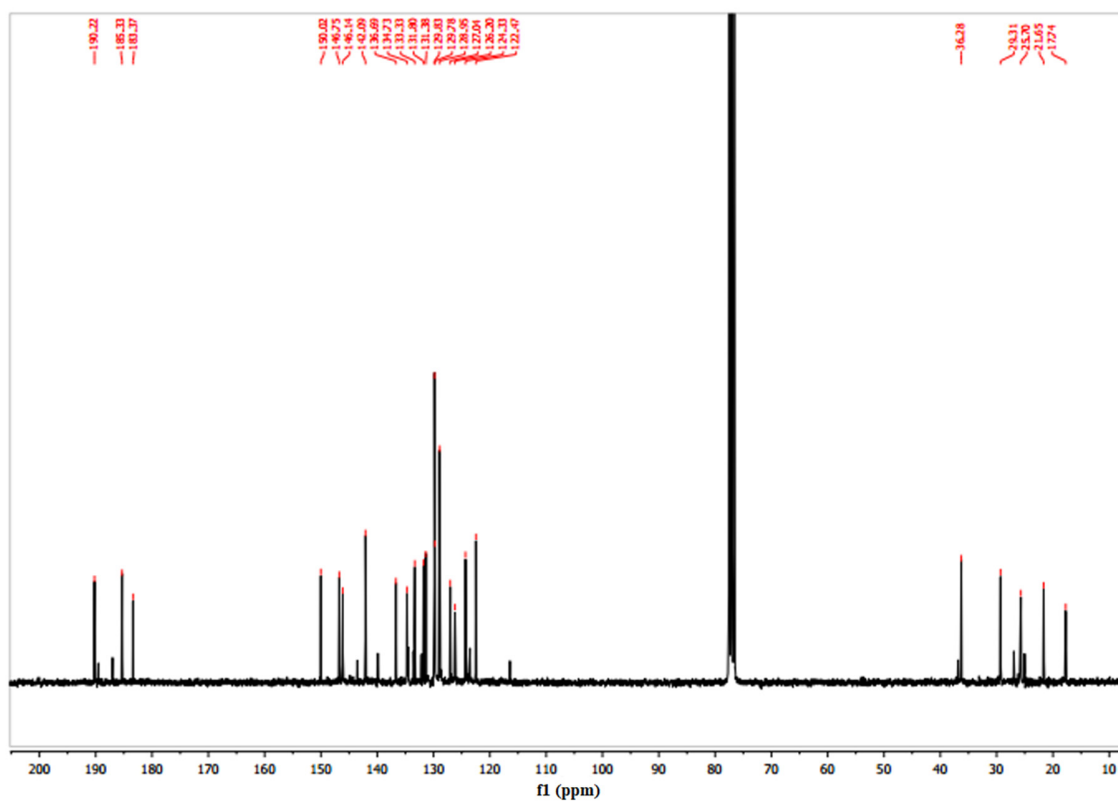

**Figure S44.** <sup>13</sup>C NMR spectrum of compound 6c.



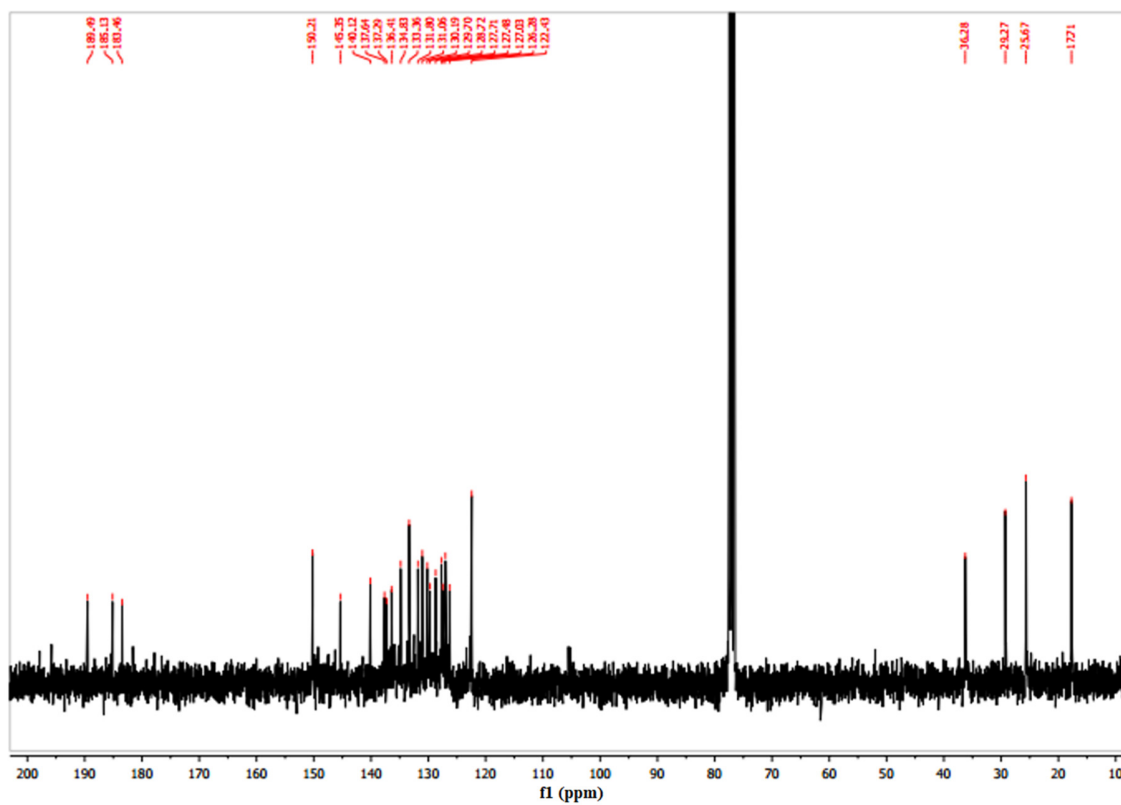

**Figure S45.** <sup>13</sup>C NMR spectrum of compound 6d.

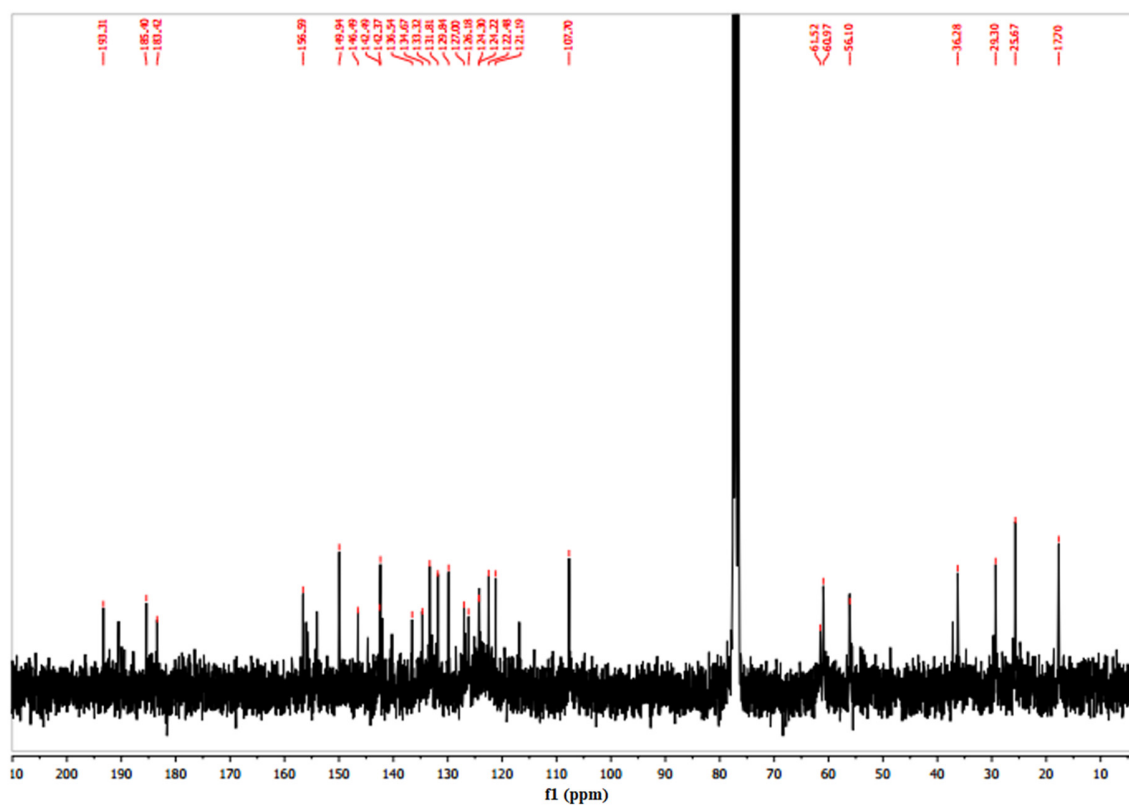

Figure S46. <sup>13</sup>C NMR spectrum of compound 6e.

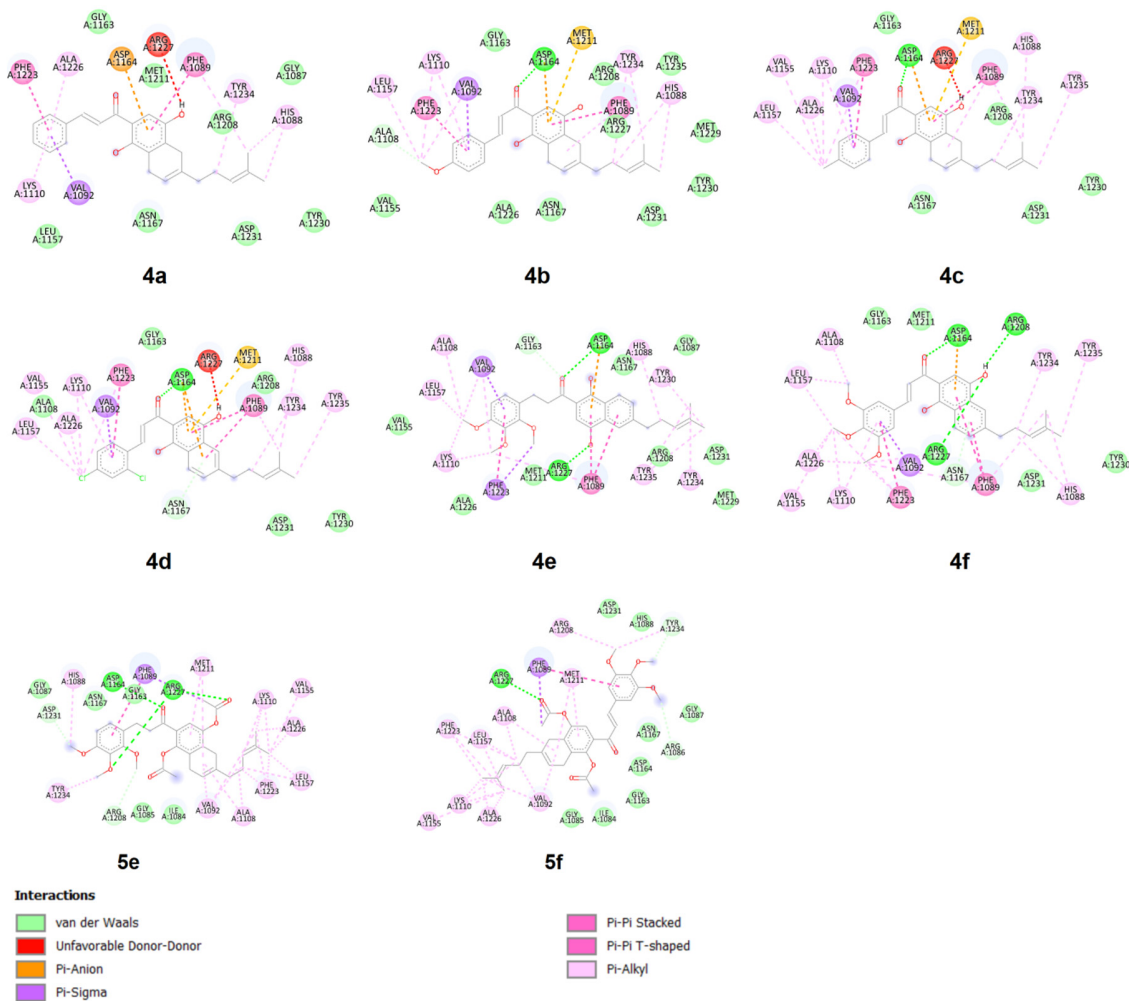

**Figure S47.** Plotted 2D maps of H-bonds and hydrophobic interactions of CNQ **5e** and **5f** with c-MET residues.



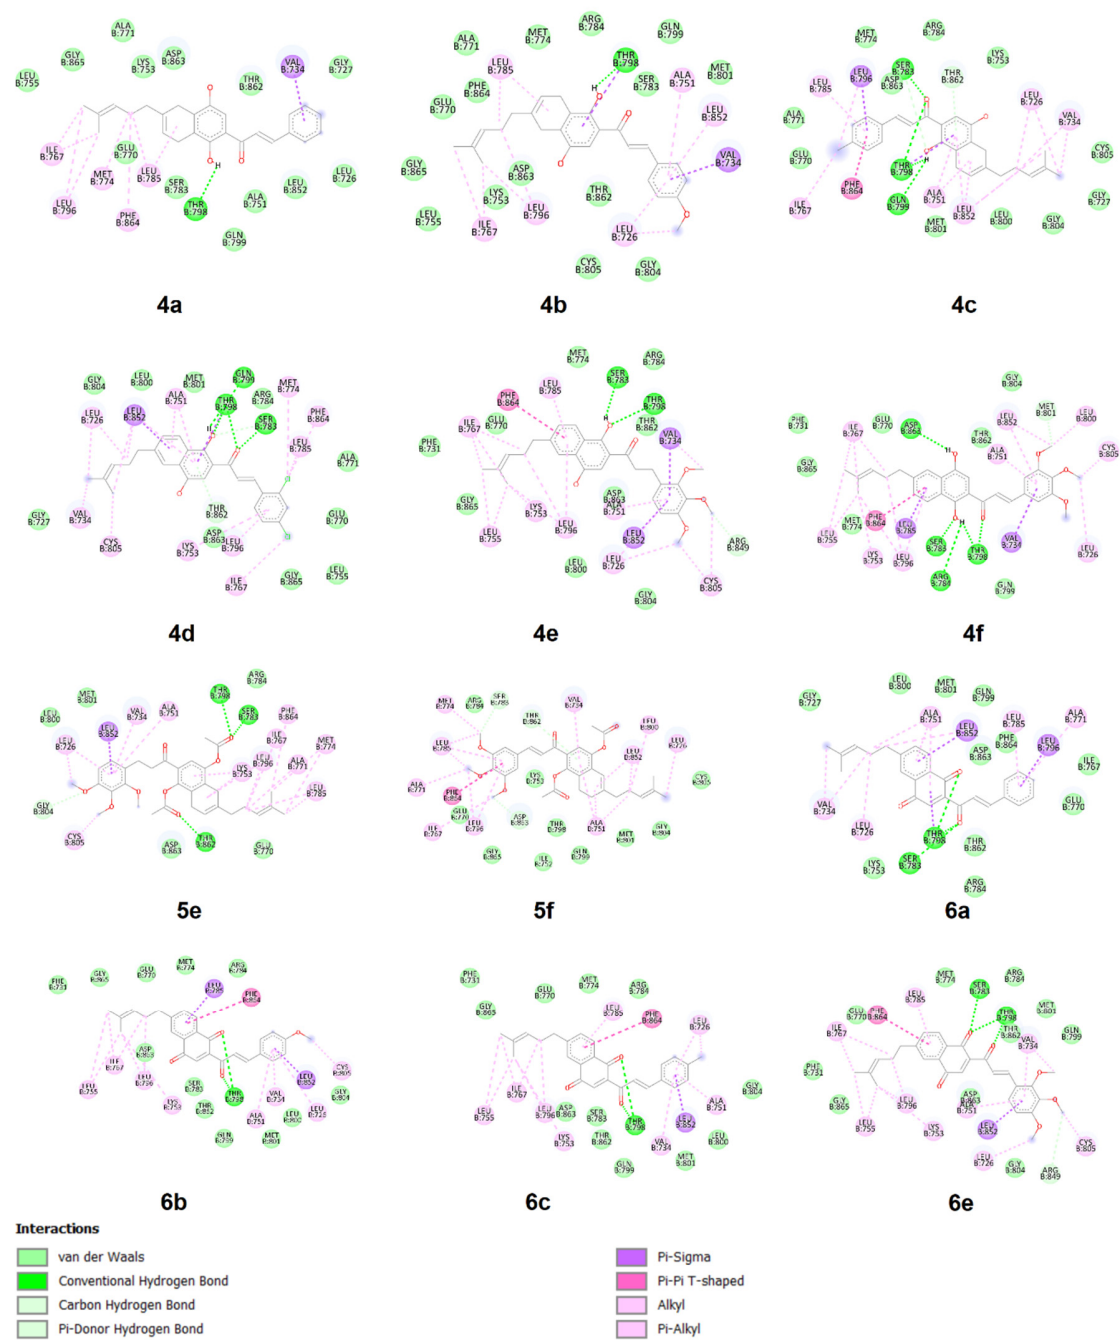

**Figure S49.** Plotted 2D maps of H-bonds and hydrophobic interactions of CNQ **5e**, **5f**, and **6a–c,e** with HER2 residues.

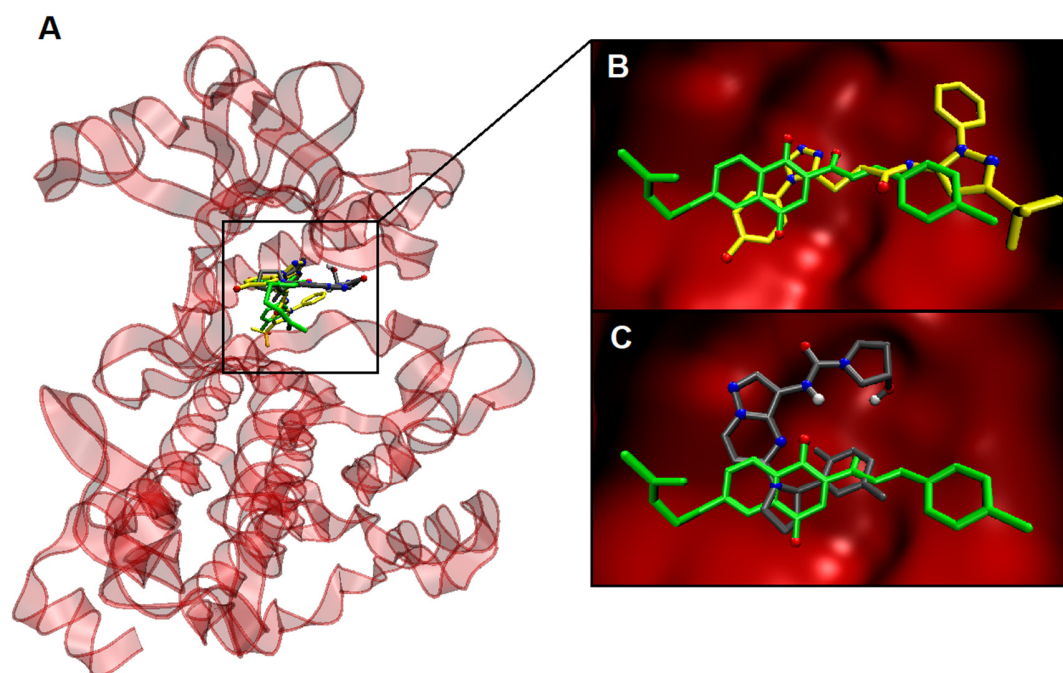

**Figure S50.** A: Overlapping of the docking poses for CNQ hybrid **6c** (green), ligand 2 (yellow), and larotrectinib (grey) into TRKA. Superimposition of the docking poses for B: **6c** and ligand 1, and C: **6c** and larotrectinib.

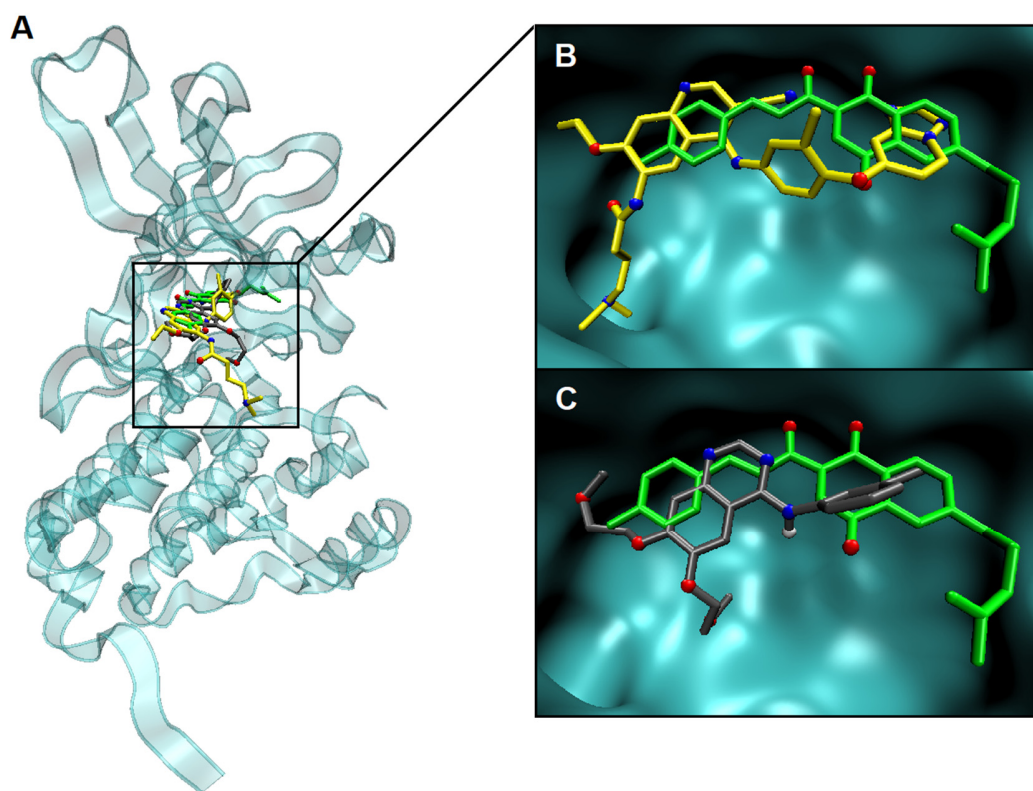

**Figure S51.** A: Overlapping of the docking poses for CNQ hybrid **6c** (green), ligand 2 (yellow), and erlotinib (grey) into HER2. Superimposition of the docking poses for B: **6c** and ligand 1, and C: **6c** and erlotinib.
