# Supplementary material for: 2-Acetyl-5,8-dihydro-6-(4-methyl-3-pentenyl)-1,4-naphthohydroquinone-Derived Chalcones as Potential Anticancer Agents
Source: MDPI journal article supplement (doi:10.3390/molecules28207172), 2023-10-19
Supplement: s1 [file s1]

**Table S1.** Predicted binding free energy values ( $\Delta G_{\text{bin}}$  kcal/mol) of synthesized cytotoxic hybrids with selected proteins overexpressed in cancer.

| Compounds   | Target proteins |        |         |       |       |       |       |        |       |       |       |       |       |        |       | Total<br>avge. |
|-------------|-----------------|--------|---------|-------|-------|-------|-------|--------|-------|-------|-------|-------|-------|--------|-------|----------------|
|             | DHFR            | FGFR-2 | VEGRF-2 | NR3A1 | EGFR  | HER2  | NR3A2 | c-MET  | TRKA  | ERK2  | MEK1  | CK4   | TPK   | TopoII | TUB   |                |
| 5e          | -7.5            | -8.9   | -7.7    | -8.7  | -7.2  | -8.3  | -8.6  | -9.8   | -8.9  | -9.0  | -9.2  | -7.6  | -8.6  | -6.7   | -8.8  | -8.34          |
| 5f          | -7.6            | -8.9   | -6.2    | -9.3  | -7.4  | -8.6  | -6.9  | -9.7   | -9.1  | -9.1  | -8.7  | -8.8  | -8.2  | -6.4   | -9.0  | -8.26          |
| 6a          | -10.0           | -9.6   | -10.3   | -9.2  | -10.6 | -10.8 | -8.8  | -10.3  | -10.5 | -9.4  | -10.5 | -9.8  | -10.3 | -6.6   | -9.7  | -9.78          |
| 6b          | -9.7            | -9.2   | -10.0   | -9.0  | -10.6 | -10.2 | -9.5  | -10.3  | -10.7 | -9.5  | -9.8  | -9.8  | -10.3 | -6.5   | -9.4  | -9.63          |
| 6c          | -9.8            | -9.6   | -10.5   | -9.2  | -11.1 | -10.4 | -9.8  | -10.6  | -11.0 | -9.8  | -10.2 | -8.8  | -10.4 | -7.0   | -9.7  | -9.86          |
| 6e          | -9.0            | -8.8   | -10.0   | -9.3  | -10.0 | -10.2 | -8.5  | -9.8   | -9.6  | -7.6  | -9.9  | -9.2  | -9.9  | -6.5   | -8.8  | -9.14          |
| P avge.     | -8.88           | -9.17  | -9.12   | -9.12 | -9.53 | -9.75 | -8.68 | -10.08 | -9.97 | -9.07 | -9.72 | -9.00 | -9.62 | -6.62  | -9.22 |                |
| Doxorubicin | -7.7            | -9.0   | -9.1    | -7.7  | -8.9  | -6.2  | -8.2  | -8.7   | -9.0  | -9.2  | -9.1  | -7.2  | -10.1 | -7.7   | -8.1  |                |

Proteins with their respective (PDB) entries: **DHFR**: Dihydrofolate reductase (1DLS); **FGFR-2**: Fibroblast growth factor receptor 2 (1GJO); **VEGRF-2**: Vascular endothelial growth factor receptor 2 (3VHE); **NR3A1**: Estrogen receptor  $\alpha$  (3ERT); **EGFR**: Epidermal growth factor receptor (5GTU); **HER2**: Epidermal growth factor receptor 2 (7JXH); **TRKA**: Tropomyosin receptor kinase A (6PL2); **NR3A2**: Estrogen receptor beta (2QTU); **c-MET**: Mesenchymal-epithelial transition factor (3RHK); **TRKA**: Tropomyosin receptor kinase A (6PL2); **ERK2**: Extra-cellular signal-regulated kinase 2 (2OJG); **MEK1**: MAPK/ERK kinase (4AN3); **CK4**: Cyclin-dependent kinase 4 (1G3N); **TPK**: Tyrosine-protein kinase (4EHZ); **TopoII**: Topoisomerase II (5GWK); **TUB**: alpha tubulin (6WSL) P avge.: Protein average. mean of the  $\Delta G_{\text{bin}}$  values for the interactions of each protein with all the hybrids; the two proteins with the highest global chalcones-1,4-Naphthoquinone /Hydroquinones affinity are highlighted on red colour.
