# Supplementary material for: 2-Acetyl-5,8-dihydro-6-(4-methyl-3-pentenyl)-1,4-naphthohydroquinone-Derived Chalcones as Potential Anticancer Agents
Source: MDPI journal article supplement (doi:10.3390/molecules28207172), 2023-10-19
Supplement: s1 [file s1]

**Table S2.** Comparison ( $\Delta G_{bin}$ , kcal/mol) of chalcones-1,4-Naphthoquinone/Hydroquinone hybrids with kinase proteins overexpressed in cancer.

| Compounds | Target proteins |       |       |       |       |       | cLogP |
|-----------|-----------------|-------|-------|-------|-------|-------|-------|
|           | EGFR            | HER2  | c-MET | TRKA  | MEK1  | TPK   |       |
| 4a        | -10.9           | -10.5 | -9.7  | -10.1 | -10.3 | -10.2 | 6.11  |
| 4b        | -10.6           | -9.8  | -9.9  | -10.3 | -9.8  | -10.0 | 6.04  |
| 4c        | -11.1           | -9.9  | -10.4 | -10.4 | -9.8  | -10.6 | 6.45  |
| 4d        | -11.2           | -10.0 | -10.3 | -10.4 | -10.2 | -10.7 | 7.32  |
| 4e        | -10.5           | -9.5  | -9.3  | -9.7  | -9.0  | -9.0  | 5.90  |
| 4f        | -10.0           | -9.4  | -9.4  | -9.1  | -10   | -8.4  | 5.90  |
| 5a        | -8.8            | -9.4  | -9.6  | -9.7  | -9.5  | -9.3  | 6.77  |
| 5'b       | -9.2            | -9.7  | -9.4  | -10.1 | -9.3  | -8.8  | 6.37  |
| 5'c       | -9.2            | -10.1 | -10.2 | -10.4 | -10.2 | -9.7  | 6.78  |
| 5'd       | -9.3            | -10   | -9.9  | -10.3 | -9.9  | -9.6  | 7.65  |
| 5e        | -7.2            | -8.3  | -9.8  | -8.9  | -9.2  | -8.6  | 6.56  |
| 5f        | -7.4            | -8.6  | -9.7  | -9.1  | -8.7  | -8.2  | 6.56  |
| 6a        | -10.6           | -10.8 | -10.3 | -10.5 | -10.5 | -10.3 | 5.53  |
| 6b        | -10.6           | -10.2 | -10.3 | -10.7 | -9.8  | -10.3 | 5.46  |
| 6c        | -11.1           | -10.4 | -10.6 | -11.0 | -10.2 | -10.4 | 5.87  |
| 6d        | -11.2           | -10.6 | -10.4 | -11.0 | -10.4 | -10.6 | 6.74  |
| 6e        | -10.0           | -10.2 | -9.8  | -9.6  | -9.9  | -9.9  | 5.32  |
| 6f        | -8.6            | -9.5  | -10.4 | -9.1  | -10.2 | -9.5  | 5.32  |

Proteins with their respective (PDB) entries: **EGFR**: Epidermal growth factor receptor (5GTY); **HER2**: Epidermal growth factor receptor 2 (7JXH); **c-MET**: Mesenchymal-epithelial transition factor (3RHK); **TRKA**: Tropomyosin receptor kinase A (6PL2); **MEK1**: MAPK/ERK kinase (4AN3); **TPK**: Tyrosine-protein kinase (4EHZ).
