# Supplementary material for: 2-Acetyl-5,8-dihydro-6-(4-methyl-3-pentenyl)-1,4-naphthohydroquinone-Derived Chalcones as Potential Anticancer Agents
Source: MDPI journal article supplement (doi:10.3390/molecules28207172), 2023-10-19
Supplement: s1 [file s1]

**Table S4.** Physical and Pharmacokinetic data predicted by QikProp<sup>a</sup> extensions for compounds **5e**, **5f**, and **6a-c,e**.

| Compound  | % HOA <sup>b</sup> | QPPCaco <sup>c</sup> | QPlogBB <sup>d</sup> | QPlogHERG <sup>e</sup> | QPlogKhsa <sup>f</sup> | QPlogS <sup>g</sup> | PSA <sup>h</sup> | Number of violations (<3) |
|-----------|--------------------|----------------------|----------------------|------------------------|------------------------|---------------------|------------------|---------------------------|
| <b>5e</b> | 90.757             | 1.454.968            | -1.168               | <b>-6.064</b>          | 0.665                  | <b>-6.773</b>       | 113.326          | 2                         |
| <b>5f</b> | 84.271             | 661.610              | -1.628               | <b>-6.101</b>          | 0.766                  | <b>-7.281</b>       | 115.871          | 2                         |
| <b>6a</b> | 100.000            | 592.613              | -1.272               | <b>-6.749</b>          | 0.416                  | -5.746              | 78.898           | 1                         |
| <b>6b</b> | 100.000            | 639.622              | -1.303               | <b>-6.515</b>          | 0.378                  | -5.749              | 87.049           | 1                         |
| <b>6c</b> | 100.000            | 602.342              | -1.283               | <b>-6.565</b>          | 0.584                  | <b>-6.260</b>       | 78.848           | 2                         |
| <b>6e</b> | 100.000            | 559.964              | -1.444               | <b>-5.799</b>          | 0.274                  | -5.312              | 101.681          | 1                         |

a: QikProp (QP) version 6.5; <sup>b</sup> HOA, Human oral absorption (>80% - high and <25% - poor) ; <sup>c</sup> QPPCaco: Predicted apparent Caco-2 cell permeability (<25 nm/sec - poor and >500 nm/sec great); <sup>d</sup> QPlogBB: Predicted log brain/blood partition coefficient (appropriate values between -3.0 and 1.2); <sup>e</sup> QPlogHERG: Predicted IC<sub>50</sub> value for blockage of HERG K<sup>+</sup> channels (above -5); <sup>f</sup> QPlogKhsa: Prediction of binding to human serum albumin (appropriate values between -1.5 and 1.5); <sup>g</sup> QPlogS: Predicted log aqueous solubility (appropriate values above -6.5); <sup>h</sup> PSA: polar surface area (appropriate values between 70–200 Å<sup>2</sup>). The intervals of appropriate values are defined by QP. Bold numbers correspond to violations of the Jorgensen Rule-of-Three.
