# Supplementary material for: 2-Acetyl-5,8-dihydro-6-(4-methyl-3-pentenyl)-1,4-naphthohydroquinone-Derived Chalcones as Potential Anticancer Agents
Source: MDPI journal article supplement (doi:10.3390/molecules28207172), 2023-10-19
Supplement: s1 [file s1]

**Table S3.** Predicted binding free energy values ( $\Delta G_{\text{bin}}$ , kcal/mol) and binding site contacts of synthesized cytotoxic hybrids with amino acids of MEK1, TPK, and EGFR.

| Compounds                                            | $\Delta G_{\text{bin}}$ | H-Bonds and Hydrophobic Contacts in the Binding Site*                                                                                                                                                                                    |
|------------------------------------------------------|-------------------------|------------------------------------------------------------------------------------------------------------------------------------------------------------------------------------------------------------------------------------------|
| MEK1 (mean $\Delta G_{\text{bin}}$ = -9.72 kcal/mol) |                         |                                                                                                                                                                                                                                          |
| 5e                                                   | -9.2                    | Gly79, <b>Lys97</b> , Ile99, Leu115, Leu118, Ile141, <b>Arg189</b> , Asp190, Cys207, Asp208, Gly210, Val211, Leu215, Ile216, Met219*, Ala220, Gly225, Arg227, Met230, <b>Arg234</b> , Tyr240                                             |
| 5f                                                   | -8.7                    | Leu74, Gly75, Ala76, Gly77, Asn78, <b>Gly79</b> , Val82, <b>Lys97</b> , Ile99, Ile141, Ser150, Asp190*, <b>Lys192</b> , <b>Ser194</b> , Asn195, Leu197, Asp208*, Phe209, Leu215, Met219*, Gly210, Ile216                                 |
| 6a                                                   | -10.5                   | <b>Lys97</b> , Ile99, Leu115, Leu118*, Val127, Gly128, Phe129, Ile141, Met143*, Arg189, Cys207, Asp208, Phe209, Gly210, Val211, Ser212, Leu215*, Ile216, Met219*, Ala220                                                                 |
| 6b                                                   | -9.8                    | Lys97, Ile99, Leu118*, Gly128, Phe129, Ile141, Met143*, Arg189*, Asp190, Asp208*, Phe209*, Gly210, Val211, Ser212, Leu215, Ile216*, Met219*, Ala220, Gly225, Met230                                                                      |
| 6c                                                   | -10.2                   | Lys97, Leu115, Leu118, Val127, Phe129, Ile141*, Met143, Arg189*, Asp190, Cys207, Asp208, Phe209, Gly210, <b>Val211</b> , <b>Ser212</b> , Leu215, Ile216*, Met219, Met230                                                                 |
| 6e                                                   | -9.9                    | Lys97, Ile99, Leu115, Leu118, Val127, Phe129, Ile141, Met143, <b>Arg189</b> , Asp190, Cys207, Asp208, Phe209, Gly210, Ser212, Val211, Leu215, Ile216, Met219, Ala220, Gly225, Thr226, met230, <b>Arg234</b> , Tyr240                     |
| TPK (mean $\Delta G_{\text{bin}}$ = -9.62 kcal/mol)  |                         |                                                                                                                                                                                                                                          |
| 5e                                                   | -8.6                    | Leu881, Gly882, Glu883, <b>Gly884</b> , His885, Phe886, Gly887, Lys888, Val889*, <b>Lys908</b> , Ser963, Glu966, His918, Asp1003, <b>Arg1007</b> , Asn1008, Leu1010, Gly1020, Asp1021*, Gly1023, Leu1024, Asp1039, Asp1042, Pro1044      |
| 5f                                                   | -8.2                    | Leu881, Gly882, Glu883, Gly884*, His885, Phe886, Gly887, Val889, <b>Lys908</b> , Leu910, His918, Asp921, Ser963, Lys965, Asp1003, <b>Arg1007</b> , Asn1008, Leu1010, Asp1021, Gly1023, Leu1024, Asp1039, Asp1042                         |
| 6a                                                   | -10.3                   | Leu881*, Gly882, Glu883, Gly884*, His885, Phe886, Gly887, Lys888, Val889*, Ala906*, Lys908*, Leu910, His918, Asp921, Leu922, Met956*, Asp1003, <b>Arg1007</b> , Asn1008, Leu1010*, Gly1020, Asp1021*                                     |
| 6b                                                   | -10.3                   | Leu881*, Gly882, Glu883, Gly884, His885, Phe886, Gly887, Lys888, Val889*, Ala906*, Lys908*, Leu910, Asp921, Leu922, Glu925, Met956*, Phe958*, Leu959*, Asp1003, <b>Arg1007</b> , Asn1008, Leu1010*, Gly1020, Asp1021*, Gly1023           |
| 6c                                                   | -10.4                   | Leu881*, Gly882, Glu883, Gly884, His885, Phe886, Gly887, Lys888, <b>Val889*</b> , Ala906*, Ly908*, Met956, Phe958*, Leu959, Asp1003, <b>Arg1007</b> , <b>Asn1008</b> , Leu1010*, Gly1020, Asp1021*, Gly1023, Leu1024, Asp1042            |
| 6e                                                   | -9.9                    | Leu881, Gly882, Glu883, Gly884, Phe886, Gly887, Lys888, Val889*, Ala906, Lys908*, Leu910, His918, Asp921, Leu922, Glu925, Phe958, Leu959, Gly962, Ser963, Lys965, Glu966, Asp1003, <b>Arg1007</b> , Asn1008, Leu1010*, Asp1021*, Gly1023 |
| EGFR (mean $\Delta G_{\text{bin}}$ = -9.53 kcal/mol) |                         |                                                                                                                                                                                                                                          |
| 5e                                                   | -7.2                    | Leu718, Gly719, Ser720, Val726*, Ala743*, Ile744, <b>Lys745</b> , Met766*, Val769, Arg776, Leu777*, Leu788, Ile789, Met790*, Gln791, Met793, Gly796, Cys797, Arg841, Leu844*, <b>Thr854</b> , Asp855, Phe856, Leu858                     |
| 5f                                                   | -7.4                    | Leu718*, Gly719, Ser720, Gly721, Val726*, Ala743, Ile744, Lys745, Met766*, Cys775, Arg776, Leu777*, Leu788*, Met790*, Gln791, Leu792, Met793, Gly796, Cys797*, Asp800, <b>Arg841</b> , Asn842, Leu844*, Asp855, Phe856, Leu858           |
| 6a                                                   | -10.6                   | Gly719, Ser720, Val726*, Ala743*, Ile744, <b>Lys745*</b> , Met766, Cys775, Arg776, Leu777, Leu788, Ile789, Met790*, Met793, Cys797, Arg841, Leu844, Thr854, Asp855, Phe856*, Leu858                                                      |
| 6b                                                   | -10.6                   | Gly719, Ser720, Val726*, Ala743, Ile744, <b>Lys745*</b> , Met766, Cys775, Arg776, Leu777, Leu788, Ile789, Met790*, Met793, Cys797 Amino Acids, Asp800, Arg841, Leu844, Thr854, Asp855, Phe856, Leu858                                    |
| 6c                                                   | -11.1                   | Val726*, Ala743*, Ile744, <b>Lys745*</b> , Met766, Cys775, Arg776, Leu777, Leu788, Ile789, Met790*, Cys797, Gly719, Arg841, Leu844 Thr854, Asp855, Phe856, Leu858                                                                        |

**6e**

-10.0 Gly719, Ser720, Gly721, Val726\*, Ala743\*, Ile744, **Lys745\***, Met766, Cys775, Arg776, Leu777, Leu788\*,  
Ile789, Met790\*, Gly796, Cys797\*, Asp800, Arg841, Asn842, Leu844, **Thr854**, Asp855, Phe856, Leu858

---

Bolded names correspond to those amino acids involved in H-bonds with the corresponding CBHQs and CNQs.

Residues with \* correspond to amino acids that interact with the ligand by any type of Pi-interactions
