# Supplementary material for: 2-Acetyl-5,8-dihydro-6-(4-methyl-3-pentenyl)-1,4-naphthohydroquinone-Derived Chalcones as Potential Anticancer Agents
Source: MDPI journal article supplement (doi:10.3390/molecules28207172), 2023-10-19
Supplement: s1 [file s1]

**Table S5.** Evaluation parameters of Lipinski's rule of five and its extensions for compounds **5e**, **5f**, and **6a-c,e**.

| Compound  | mol_MW<br>(<500amu) | donorHB<br>(<5) | acptHB<br>(<10) | QPlogPo/w<br>(<5) | #rotor<br>(0–15) | N of violations<br>(<5) |
|-----------|---------------------|-----------------|-----------------|-------------------|------------------|-------------------------|
| <b>5e</b> | <b>548.632</b>      | 0.000           | 9.250           | <b>5.656</b>      | 12               | 2                       |
| <b>5f</b> | <b>548.632</b>      | 0.000           | 9.250           | <b>5.595</b>      | 12               | 2                       |
| <b>6a</b> | 370.447             | 0.000           | 6.000           | 4.202             | 7                | 0                       |
| <b>6b</b> | 400.473             | 0.000           | 6.750           | 4.283             | 8                | 0                       |
| <b>6c</b> | 384.474             | 0.000           | 6.000           | 4.519             | 7                | 0                       |
| <b>6e</b> | 460.526             | 0.000           | 8.250           | 4.216             | 10               | 0                       |

a: QikProp (QP) version 6.5; mol\_MW: Molecular weight; donorHB: Number of hydrogen-bond donors (OH, NH, SH); acptHB: Number of hydrogen-bond acceptors (heteroatom O; N; S; F or pairs of transferable electrons); logP: Predicted log *n*-octanol/water partition coefficient; #rotor: Number of non-trivial (not CX3), non-hindered (not alkene, amide, small ring) rotatable bonds. Bold numbers correspond to Lipinski Rule-of Five violations.
